# Supplementary material for: Computationally-accelerated prediction of polyester-melamine coatings degradation to design sustainable organically-coated steels for outdoor applications
Source: Royal Society of Chemistry journal article supplement (doi:10.1039/d3ra06744k), 2024-01-01
Supplement: d3ra06744k1.pdf [file d3ra06744k1.pdf]

**Table 1** - Overview of the identified electrophilic and nucleophilic attack sites of computationally-produced model structures

| Model     | Number of electrophilic sites | Number of nucleophilic sites | Total |
|-----------|-------------------------------|------------------------------|-------|
| HHPA      | 8                             | 8                            | 16    |
| HHPA NPG  | 8                             | 8                            | 16    |
| HHPA TMP  | 9                             | 3                            | 12    |
| HHPA HMMM | 9                             | 10                           | 19    |
| CHDA      | 8                             | 12                           | 20    |
| CHDA NPG  | 12                            | 10                           | 22    |
| CHDA TMP  | 7                             | 6                            | 13    |
| CHDA HMMM | 6                             | 6                            | 12    |
| TMA       | 10                            | 18                           | 28    |
| TMA NPG   | 8                             | 8                            | 16    |
| TMA TMP   | 9                             | 15                           | 24    |
| TMA HMMM  | 16                            | 16                           | 32    |
| DDSA      | 5                             | 8                            | 13    |
| DDSA NPG  | 4                             | 7                            | 11    |
| DDSA TMP  | 6                             | 7                            | 13    |
| DDSA HMMM | 6                             | 10                           | 16    |

**Table 1** gives an overview of the number of electrophilic and nucleophilic attack sites as identified through computational chemical modelling.

**Table 2**-Weighted attack sites as a function of the polyester-melamine ratio.

| Monomer base | Number of electrophilic sites | Number of nucleophilic sites | Total |
|--------------|-------------------------------|------------------------------|-------|
| HHPA         | 17.8                          | 14.8                         | 32.6  |
| CHDA         | 22.8                          | 23.6                         | 46.4  |
| TMA          | 24.8                          | 35.2                         | 60.0  |
| DDSA         | 13.2                          | 19.6                         | 32.8  |

**Table 2** breaks down the number of electrophilic and nucleophilic attack sites for the monomers investigated within the manuscript. It also includes Dodecenyl succinic anhydride (DDSA) and Trimellitic anhydride (TMA) based coating systems that have been calculated. The two new

monomers have been included to show that other monomers of past and present interest to the coatings industry.

The results suggest the DDSA would produce a coating that is better able to resist weathering degradation than CHDA and is comparable to HHPA. Likewise, TMA is projected to produce a coating that weathers more rapidly than the coatings investigated within this study.

Further work would look at producing coating systems based on DDSA and TMA and approximately equivalent to those already investigated. The new coating systems would then be subjected to extended weathering programs as described within the manuscript so that a more accurate comparison could be made.
