# Supplementary material for: Computationally-accelerated prediction of polyester-melamine coatings degradation to design sustainable organically-coated steels for outdoor applications
Source: Royal Society of Chemistry journal article supplement (doi:10.1039/d3ra06744k), 2024-01-01
Supplement: d3ra06744k2.pdf [file d3ra06744k2.pdf]

### HHPA

| Mode | freq (cm <sup>-1</sup> ) | T**2       | TX          | TY         | TZ         |
|------|--------------------------|------------|-------------|------------|------------|
| 6:   | 99.57                    | 0.268317   | ( -0.225872 | -0.431086  | 0.177380)  |
| 7:   | 146.57                   | 6.811966   | ( 0.127422  | 1.008916   | 2.403709)  |
| 8:   | 168.10                   | 1.175218   | ( 0.787263  | -0.083316  | 0.740603)  |
| 9:   | 220.63                   | 2.204913   | ( 1.249437  | -0.763683  | -0.246190) |
| 10:  | 286.25                   | 3.307129   | ( -0.778637 | -1.498133  | 0.675611)  |
| 11:  | 311.02                   | 1.988841   | ( -0.359598 | -0.359523  | -1.315399) |
| 12:  | 326.61                   | 5.876329   | ( -1.039807 | -2.005734  | 0.878727)  |
| 13:  | 437.79                   | 1.841176   | ( -0.574982 | -1.125052  | 0.494802)  |
| 14:  | 462.67                   | 7.521221   | ( -2.258712 | 1.428633   | 0.615183)  |
| 15:  | 480.79                   | 1.514308   | ( -0.533243 | -1.012274  | 0.453056)  |
| 16:  | 534.13                   | 4.788529   | ( -1.217741 | 1.229925   | 1.338999)  |
| 17:  | 615.37                   | 0.334102   | ( 0.246019  | 0.481226   | -0.204936) |
| 18:  | 649.17                   | 1.567861   | ( -0.533131 | -1.037603  | 0.454984)  |
| 19:  | 659.34                   | 7.088854   | ( -0.187965 | -0.993267  | -2.463117) |
| 20:  | 748.82                   | 23.970072  | ( 4.428850  | -1.910968  | 0.838787)  |
| 21:  | 803.45                   | 0.551395   | ( 0.322571  | 0.610940   | -0.272206) |
| 22:  | 837.85                   | 2.846123   | ( -0.687979 | -1.417315  | 0.603346)  |
| 23:  | 854.61                   | 4.242180   | ( -1.749582 | 1.029040   | 0.349600)  |
| 24:  | 877.87                   | 0.548659   | ( 0.365161  | 0.581246   | -0.278333) |
| 25:  | 903.90                   | 350.543077 | ( 15.906017 | -9.465489  | -2.818902) |
| 26:  | 928.68                   | 0.303854   | ( -0.491558 | 0.184199   | -0.168214) |
| 27:  | 943.90                   | 32.640293  | ( -4.984118 | 2.760124   | 0.424948)  |
| 28:  | 953.97                   | 2.542778   | ( -0.753976 | -1.278052  | 0.583850)  |
| 29:  | 1057.39                  | 20.831928  | ( 2.742987  | -2.556714  | -2.602146) |
| 30:  | 1061.57                  | 0.020646   | ( -0.012299 | -0.143031  | 0.006053)  |
| 31:  | 1087.90                  | 8.906398   | ( -1.894654 | 1.685887   | 1.573044)  |
| 32:  | 1114.52                  | 9.923184   | ( -1.319639 | -2.624178  | 1.138169)  |
| 33:  | 1142.40                  | 13.114797  | ( 1.543685  | 2.991532   | -1.335131) |
| 34:  | 1168.26                  | 17.191606  | ( -2.981420 | 2.348702   | 1.669232)  |
| 35:  | 1199.08                  | 128.511239 | ( 4.851141  | 9.351091   | -4.187453) |
| 36:  | 1236.27                  | 35.116517  | ( 2.540932  | 4.887378   | -2.184885) |
| 37:  | 1250.37                  | 4.244813   | ( 1.835109  | -0.920630  | 0.172132)  |
| 38:  | 1266.12                  | 5.016343   | ( -0.961412 | -1.852585  | 0.812378)  |
| 39:  | 1302.89                  | 0.926931   | ( -0.660267 | 0.060157   | -0.698111) |
| 40:  | 1322.88                  | 12.252748  | ( 1.478318  | 2.905996   | -1.273777) |
| 41:  | 1329.40                  | 0.220291   | ( -0.446571 | 0.100288   | -0.103958) |
| 42:  | 1359.26                  | 0.715708   | ( -0.351584 | -0.704199  | 0.310163)  |
| 43:  | 1373.27                  | 0.781464   | ( 0.365318  | 0.744118   | -0.307073) |
| 44:  | 1375.24                  | 0.292181   | ( -0.375306 | 0.252532   | 0.295895)  |
| 45:  | 1387.86                  | 6.469658   | ( -1.081811 | -2.111855  | 0.916193)  |
| 46:  | 1397.41                  | 3.470935   | ( 1.366581  | -1.012331  | -0.760642) |
| 47:  | 1492.27                  | 5.848120   | ( -0.135322 | 1.028988   | 2.184260)  |
| 48:  | 1492.68                  | 3.415201   | ( 0.753696  | 1.527236   | -0.717422) |
| 49:  | 1499.31                  | 10.573537  | ( -2.549001 | 0.422144   | -1.974316) |
| 50:  | 1507.05                  | 0.083425   | ( -0.069748 | -0.237786  | 0.148384)  |
| 51:  | 1852.51                  | 625.839055 | ( 21.947771 | -11.922298 | -1.411806) |
| 52:  | 1915.45                  | 138.226117 | ( 4.981742  | 9.730004   | -4.328440) |
| 53:  | 2955.81                  | 3.473410   | ( 0.845756  | 1.573358   | -0.531650) |
| 54:  | 2969.73                  | 7.272630   | ( -0.584024 | -0.687046  | -2.541557) |
| 55:  | 2997.22                  | 8.422967   | ( 1.288697  | 2.026227   | -1.629917) |
| 56:  | 3005.14                  | 25.067964  | ( -1.056804 | 2.770925   | 4.033994)  |
| 57:  | 3021.20                  | 8.425455   | ( 2.169159  | 1.074187   | 1.601976)  |
| 58:  | 3021.60                  | 33.906854  | ( 3.455478  | -0.362101  | 4.672838)  |
| 59:  | 3055.17                  | 42.507495  | ( 3.879045  | 5.036214   | -1.448121) |
| 60:  | 3057.06                  | 41.001270  | ( -4.351347 | 2.160761   | -4.171110) |
| 61:  | 3074.01                  | 9.355380   | ( -0.572993 | 2.227027   | 2.016782)  |
| 62:  | 3074.96                  | 36.573101  | ( -2.194024 | 2.783684   | 4.900047)  |

The first frequency considered to be a vibration is 6  
 The total number of vibrations considered is 57

## HMMM and HHPA

| Mode | freq (cm <sup>-1</sup> ) | T**2       | TX          | TY        | TZ         |
|------|--------------------------|------------|-------------|-----------|------------|
| 6:   | 4.52                     | 0.000000   | ( 0.000000  | 0.000000  | 0.000000)  |
| 7:   | 12.70                    | 0.472164   | ( 0.575164  | -0.345000 | -0.149417) |
| 8:   | 13.21                    | 0.230649   | ( 0.198045  | -0.314011 | 0.304671)  |
| 9:   | 18.95                    | 0.132739   | ( 0.260951  | -0.243504 | 0.073143)  |
| 10:  | 24.39                    | 0.956683   | ( -0.368376 | -0.562969 | 0.709964)  |
| 11:  | 32.38                    | 1.084810   | ( -0.075528 | 1.032138  | -0.117458) |
| 12:  | 35.53                    | 1.581257   | ( -0.290418 | -1.065114 | 0.602035)  |
| 13:  | 35.90                    | 1.472903   | ( -1.047881 | -0.571837 | -0.218749) |
| 14:  | 50.26                    | 0.106253   | ( -0.282338 | 0.151398  | 0.060143)  |
| 15:  | 55.60                    | 2.031120   | ( -0.322149 | 0.818943  | -1.121014) |
| 16:  | 69.12                    | 1.121920   | ( -0.893828 | 0.138770  | -0.551120) |
| 17:  | 74.78                    | 2.136226   | ( -0.494155 | 1.290554  | 0.475928)  |
| 18:  | 79.52                    | 2.985970   | ( 1.513419  | -0.787193 | -0.275427) |
| 19:  | 91.86                    | 1.850928   | ( 0.351794  | -0.756198 | -1.074864) |
| 20:  | 97.15                    | 5.663375   | ( 1.971731  | 1.325488  | -0.136868) |
| 21:  | 119.37                   | 1.772790   | ( -0.964685 | 0.714649  | 0.575717)  |
| 22:  | 127.48                   | 1.128221   | ( 0.213160  | -0.841271 | -0.612410) |
| 23:  | 134.52                   | 0.577160   | ( -0.734799 | -0.188547 | -0.040994) |
| 24:  | 140.75                   | 2.150962   | ( 0.587328  | 1.255078  | -0.480402) |
| 25:  | 158.85                   | 0.519282   | ( 0.206613  | -0.088045 | -0.684720) |
| 26:  | 160.50                   | 0.533723   | ( 0.569056  | -0.293917 | -0.351440) |
| 27:  | 164.05                   | 0.854303   | ( 0.836811  | 0.258692  | 0.295176)  |
| 28:  | 172.84                   | 1.819159   | ( 1.295489  | -0.343959 | -0.150200) |
| 29:  | 176.41                   | 1.430456   | ( -0.867689 | -0.813795 | -0.123731) |
| 30:  | 186.07                   | 0.818606   | ( -0.858190 | -0.204036 | 0.201208)  |
| 31:  | 200.48                   | 1.408471   | ( -0.467342 | -1.035123 | -0.344358) |
| 32:  | 208.67                   | 11.855768  | ( -1.702637 | -2.274928 | 1.944608)  |
| 33:  | 229.65                   | 5.977844   | ( -0.596656 | 2.356354  | 0.263515)  |
| 34:  | 238.70                   | 11.977967  | ( 2.751346  | 1.512650  | -1.456006) |
| 35:  | 252.24                   | 3.353510   | ( 1.005420  | 1.355142  | -0.711499) |
| 36:  | 272.07                   | 0.868226   | ( -0.583200 | 0.196462  | 0.699648)  |
| 37:  | 293.78                   | 3.670692   | ( -0.531425 | -1.840288 | -0.040229) |
| 38:  | 297.79                   | 0.773910   | ( 0.747090  | 0.281513  | -0.369482) |
| 39:  | 307.01                   | 0.821982   | ( -0.405302 | 0.349540  | -0.731802) |
| 40:  | 313.92                   | 5.532396   | ( -0.205866 | -2.314854 | 0.362580)  |
| 41:  | 320.47                   | 1.087640   | ( 0.467937  | -0.610450 | 0.704291)  |
| 42:  | 349.67                   | 1.678152   | ( -0.659079 | -0.670319 | 0.891313)  |
| 43:  | 376.18                   | 5.124588   | ( 1.945691  | 1.156615  | 0.033405)  |
| 44:  | 379.42                   | 5.750431   | ( 1.786538  | 1.599064  | -0.041310) |
| 45:  | 406.04                   | 6.286681   | ( -2.249044 | -1.017346 | -0.439877) |
| 46:  | 412.79                   | 2.665538   | ( 0.972214  | 0.760873  | 1.068368)  |
| 47:  | 423.88                   | 2.367713   | ( -1.371237 | -0.528559 | 0.456124)  |
| 48:  | 448.06                   | 2.879805   | ( -0.164690 | -1.680342 | -0.170682) |
| 49:  | 488.63                   | 39.168178  | ( 6.216024  | 0.687567  | 0.237640)  |
| 50:  | 494.94                   | 11.115580  | ( -2.264548 | 1.711078  | 1.749176)  |
| 51:  | 511.13                   | 30.871822  | ( -2.467982 | 4.958332  | 0.442529)  |
| 52:  | 537.98                   | 54.493270  | ( 7.011385  | -0.900993 | -2.126490) |
| 53:  | 548.59                   | 16.802501  | ( 3.464617  | -2.167432 | 0.318070)  |
| 54:  | 561.12                   | 14.937617  | ( 3.620907  | 0.664480  | 1.176909)  |
| 55:  | 567.15                   | 36.913262  | ( 2.287081  | 5.611018  | -0.446097) |
| 56:  | 608.46                   | 1.342914   | ( 0.388641  | 1.084541  | 0.125068)  |
| 57:  | 629.46                   | 8.991988   | ( -2.520696 | 1.622935  | -0.064514) |
| 58:  | 645.36                   | 24.783579  | ( -3.978015 | 2.961216  | 0.436091)  |
| 59:  | 656.51                   | 51.117438  | ( 0.250996  | -7.072781 | -1.014988) |
| 60:  | 715.35                   | 4.315711   | ( -0.926634 | 1.759263  | 0.601710)  |
| 61:  | 723.77                   | 56.609858  | ( -6.233707 | -4.207643 | -0.215620) |
| 62:  | 739.08                   | 22.072524  | ( -3.835730 | -2.364758 | 1.329519)  |
| 63:  | 757.18                   | 74.432146  | ( -0.343686 | -8.587214 | 0.757490)  |
| 64:  | 757.78                   | 7.512912   | ( 2.476808  | -1.107821 | 0.388675)  |
| 65:  | 786.47                   | 53.731587  | ( 0.428949  | 7.219937  | 1.191678)  |
| 66:  | 799.25                   | 1.727741   | ( -0.083174 | -1.230373 | -0.454978) |
| 67:  | 823.06                   | 58.817794  | ( 7.122190  | -2.843214 | -0.091306) |
| 68:  | 836.01                   | 100.847691 | ( 9.814863  | -1.410504 | 1.589540)  |
| 69:  | 850.12                   | 20.813110  | ( -3.289864 | -3.014848 | 0.948997)  |
| 70:  | 855.70                   | 40.676234  | ( -4.151970 | -0.009589 | 4.841207)  |
| 71:  | 906.57                   | 12.412813  | ( -1.391417 | -3.183493 | -0.584929) |
| 72:  | 911.44                   | 4.882154   | ( 0.410694  | 0.154204  | -2.165573) |
| 73:  | 924.43                   | 6.587778   | ( -0.864846 | -2.316549 | 0.688053)  |
| 74:  | 939.57                   | 77.654236  | ( -3.182213 | -8.173839 | 0.846234)  |
| 75:  | 953.61                   | 6.525066   | ( 1.577191  | -0.735023 | 1.870100)  |
| 76:  | 972.55                   | 57.217122  | ( -3.675161 | -6.446429 | 1.467605)  |
| 77:  | 973.88                   | 24.314258  | ( 2.846606  | -3.494633 | -1.999658) |

|      |         |            |   |            |            |             |
|------|---------|------------|---|------------|------------|-------------|
| 78:  | 991.22  | 48.946149  | ( | 4.565785   | 2.053234   | -4.887124)  |
| 79:  | 1000.62 | 18.267483  | ( | 0.481346   | 4.178568   | 0.758524)   |
| 80:  | 1011.43 | 245.409032 | ( | 5.563172   | 14.605892  | 1.062101)   |
| 81:  | 1015.89 | 23.978409  | ( | 4.286690   | 0.388828   | -2.334847)  |
| 82:  | 1026.25 | 121.413756 | ( | -8.700424  | -6.685312  | -1.011428)  |
| 83:  | 1041.15 | 26.646456  | ( | 4.112138   | -1.783495  | -2.560453)  |
| 84:  | 1043.20 | 59.287079  | ( | -7.382590  | 1.332561   | 1.734570)   |
| 85:  | 1051.88 | 46.201608  | ( | 4.376740   | -3.409358  | -3.927090)  |
| 86:  | 1073.29 | 13.724717  | ( | 2.798626   | 2.367277   | -0.537039)  |
| 87:  | 1097.60 | 76.004284  | ( | 6.319525   | 5.787927   | 1.602431)   |
| 88:  | 1100.74 | 125.558300 | ( | 2.832186   | 1.071670   | 10.788352)  |
| 89:  | 1104.45 | 76.609373  | ( | 0.551531   | 4.607381   | 7.421403)   |
| 90:  | 1107.27 | 104.702635 | ( | 3.698733   | 4.647630   | -8.331959)  |
| 91:  | 1123.69 | 215.801058 | ( | -12.846403 | -1.468749  | -6.972357)  |
| 92:  | 1130.87 | 194.965376 | ( | -7.169805  | -11.292262 | 4.005509)   |
| 93:  | 1143.86 | 117.022167 | ( | 1.521461   | -9.118540  | 5.617789)   |
| 94:  | 1165.25 | 8.115957   | ( | -1.779509  | -1.618652  | 1.526195)   |
| 95:  | 1167.89 | 2.705436   | ( | 0.085062   | 1.631269   | -0.192776)  |
| 96:  | 1171.00 | 5.469305   | ( | -2.113276  | -0.988492  | 0.162023)   |
| 97:  | 1172.61 | 3.949457   | ( | -1.560383  | -0.603111  | -1.072809)  |
| 98:  | 1176.81 | 0.602243   | ( | -0.684240  | 0.073071   | 0.358774)   |
| 99:  | 1177.75 | 6.211630   | ( | -2.375044  | 0.253889   | 0.711573)   |
| 100: | 1183.51 | 57.889795  | ( | -6.737480  | -0.194960  | -3.529610)  |
| 101: | 1206.13 | 3.477650   | ( | -1.693813  | -0.771116  | 0.118435)   |
| 102: | 1210.52 | 30.888027  | ( | 0.618680   | -0.105970  | 5.522140)   |
| 103: | 1211.68 | 5.571138   | ( | 1.763783   | -0.996167  | -1.211552)  |
| 104: | 1216.29 | 7.396528   | ( | -1.527456  | -1.557444  | -1.624122)  |
| 105: | 1217.02 | 3.923891   | ( | 1.112888   | -0.177094  | 1.629113)   |
| 106: | 1238.08 | 68.389870  | ( | 2.577724   | -7.685330  | 1.637351)   |
| 107: | 1245.79 | 13.229650  | ( | 2.960145   | -2.066968  | -0.441400)  |
| 108: | 1247.68 | 16.870044  | ( | 2.796956   | 3.006677   | 0.083514)   |
| 109: | 1299.08 | 8.865567   | ( | -1.244273  | -2.699607  | -0.171682)  |
| 110: | 1306.62 | 1.616501   | ( | 0.907367   | 0.183750   | 0.871449)   |
| 111: | 1319.20 | 5.610746   | ( | 0.640598   | 1.909144   | -1.247216)  |
| 112: | 1334.61 | 44.864283  | ( | 5.194011   | 4.054347   | 1.203660)   |
| 113: | 1340.78 | 91.070302  | ( | -7.859819  | -5.367859  | 0.692560)   |
| 114: | 1344.48 | 98.551617  | ( | 8.020997   | 5.666709   | -1.450391)  |
| 115: | 1365.16 | 6.905671   | ( | 2.536369   | -0.096196  | -0.680624)  |
| 116: | 1373.22 | 0.756453   | ( | 0.260792   | 0.589476   | -0.583916)  |
| 117: | 1381.48 | 11.701289  | ( | 0.826299   | -2.922775  | 1.573501)   |
| 118: | 1385.29 | 55.302161  | ( | -5.315573  | 4.174686   | -3.101427)  |
| 119: | 1393.77 | 381.674379 | ( | -18.371167 | 5.757949   | 3.319730)   |
| 120: | 1401.63 | 16.255961  | ( | -2.434997  | 3.052288   | -1.005130)  |
| 121: | 1406.95 | 16.077725  | ( | 3.130987   | 2.419852   | 0.647270)   |
| 122: | 1424.65 | 56.646784  | ( | -5.643137  | -4.958248  | 0.466443)   |
| 123: | 1449.67 | 150.251796 | ( | -1.176199  | -12.201145 | -0.020402)  |
| 124: | 1457.42 | 3.284022   | ( | -0.967949  | -1.106589  | 1.059508)   |
| 125: | 1458.23 | 7.844288   | ( | 0.447903   | 2.734888   | -0.405043)  |
| 126: | 1462.54 | 1.589140   | ( | 0.900915   | -0.543633  | 0.694229)   |
| 127: | 1473.97 | 4.727517   | ( | 1.223706   | -1.643011  | 0.728405)   |
| 128: | 1476.72 | 9.060514   | ( | 2.862797   | 0.853910   | 0.368435)   |
| 129: | 1479.43 | 3.786786   | ( | 0.021097   | 1.307092   | 1.441475)   |
| 130: | 1480.85 | 1.810246   | ( | 0.750369   | 1.116565   | 0.021821)   |
| 131: | 1481.97 | 9.944508   | ( | -0.641847  | -2.883126  | 1.104593)   |
| 132: | 1483.36 | 5.309347   | ( | -1.261353  | 1.426470   | -1.297505)  |
| 133: | 1485.45 | 4.472347   | ( | 1.773297   | 0.284356   | -1.116650)  |
| 134: | 1494.10 | 4.107384   | ( | -1.188174  | -1.609166  | 0.325902)   |
| 135: | 1495.84 | 6.407449   | ( | 2.029513   | -1.378952  | 0.622107)   |
| 136: | 1497.24 | 9.139231   | ( | -1.743939  | 0.608918   | 2.393142)   |
| 137: | 1500.70 | 11.651902  | ( | 3.168493   | 0.699543   | 1.059809)   |
| 138: | 1504.76 | 3.857731   | ( | -0.066306  | 1.401536   | 1.374420)   |
| 139: | 1506.37 | 1.787794   | ( | 0.718322   | 0.721851   | -0.866451)  |
| 140: | 1508.91 | 7.254529   | ( | 0.126633   | 2.099027   | 1.683027)   |
| 141: | 1509.69 | 1.916725   | ( | 0.682253   | -0.696974  | 0.982590)   |
| 142: | 1510.22 | 9.911663   | ( | -1.410449  | 0.669422   | -2.733893)  |
| 143: | 1581.80 | 359.494636 | ( | -0.570532  | -18.943257 | 0.567583)   |
| 144: | 1589.04 | 668.571668 | ( | 25.744239  | -0.281531  | -2.393022)  |
| 145: | 1800.64 | 229.558462 | ( | -0.337725  | -2.777079  | 14.890676)  |
| 146: | 1831.91 | 198.928959 | ( | 6.403419   | -1.560439  | -12.469571) |
| 147: | 2941.52 | 31.896574  | ( | -5.614627  | -0.583957  | 0.177566)   |
| 148: | 2979.28 | 48.666199  | ( | 4.209798   | 0.157025   | 5.560498)   |
| 149: | 2987.55 | 72.636962  | ( | -5.472929  | -6.287388  | 1.775602)   |
| 150: | 2997.49 | 16.879946  | ( | 3.407741   | 2.257871   | -0.411417)  |
| 151: | 3007.17 | 9.653907   | ( | -2.020670  | 1.594489   | -1.740232)  |
| 152: | 3012.64 | 4.421389   | ( | -0.659023  | 1.743207   | 0.973812)   |
| 153: | 3014.23 | 19.568531  | ( | -2.544192  | -3.285087  | -1.517835)  |
| 154: | 3018.30 | 65.667273  | ( | 5.241777   | -4.180427  | -4.551382)  |
| 155: | 3019.22 | 42.072986  | ( | 3.102659   | -4.287270  | -3.750441)  |
| 156: | 3026.68 | 48.123531  | ( | -3.469460  | -5.591547  | 2.195674)   |

|      |         |           |             |           |            |
|------|---------|-----------|-------------|-----------|------------|
| 157: | 3027.07 | 30.426788 | ( -4.520665 | 1.958749  | 2.480661)  |
| 158: | 3035.95 | 39.429483 | ( 4.289508  | -4.021373 | -2.204123) |
| 159: | 3036.62 | 16.947867 | ( 1.888323  | 0.782369  | 3.573514)  |
| 160: | 3065.23 | 35.335471 | ( -3.815346 | 4.558224  | 0.034734)  |
| 161: | 3067.66 | 24.690122 | ( 1.699866  | 2.384042  | -4.014588) |
| 162: | 3077.76 | 15.449131 | ( -2.734582 | 2.279150  | -1.666333) |
| 163: | 3081.32 | 32.199816 | ( -4.954796 | -2.304820 | 1.528926)  |
| 164: | 3083.86 | 12.716325 | ( 1.577336  | 1.262621  | -2.938388) |
| 165: | 3084.54 | 24.743034 | ( 4.763985  | 0.408411  | 1.371380)  |
| 166: | 3084.96 | 27.775204 | ( -2.493875 | 4.308655  | -1.729531) |
| 167: | 3111.53 | 23.891482 | ( -2.042127 | 3.284298  | 2.989078)  |
| 168: | 3114.22 | 13.864994 | ( 3.131843  | 1.735558  | 1.021956)  |
| 169: | 3115.86 | 14.691591 | ( -0.204941 | -2.947348 | 2.441870)  |
| 170: | 3117.28 | 19.698463 | ( 1.111278  | -0.410950 | 4.277224)  |
| 171: | 3121.67 | 16.602374 | ( 2.884534  | 1.063061  | 2.674274)  |
| 172: | 3130.48 | 8.608174  | ( 1.284477  | -1.357467 | 2.261763)  |
| 173: | 3743.62 | 73.235728 | ( 8.335545  | 0.943215  | -1.692564) |

The first frequency considered to be a vibration is 6  
The total number of vibrations considered is 168

### CHDA

| Mode | freq (cm**-1) | T**2       | TX          | TY        | TZ         |
|------|---------------|------------|-------------|-----------|------------|
| 6:   | 15.06         | 1.256134   | ( 0.744146  | 0.585430  | -0.599710) |
| 7:   | 23.26         | 0.669801   | ( 0.669859  | 0.357347  | 0.305604)  |
| 8:   | 53.63         | 0.368652   | ( -0.081625 | 0.042550  | -0.600149) |
| 9:   | 130.90        | 0.539515   | ( 0.670293  | -0.248329 | -0.168982) |
| 10:  | 169.00        | 1.201928   | ( 0.607300  | -0.906065 | -0.110273) |
| 11:  | 213.24        | 0.463360   | ( -0.154321 | 0.537390  | 0.388275)  |
| 12:  | 220.59        | 0.099455   | ( 0.158980  | 0.058318  | 0.266043)  |
| 13:  | 250.61        | 0.515127   | ( -0.396178 | 0.050654  | -0.596326) |
| 14:  | 295.89        | 2.067343   | ( 0.318229  | -0.391275 | -1.346468) |
| 15:  | 359.42        | 0.270333   | ( -0.109701 | -0.477792 | -0.173245) |
| 16:  | 437.33        | 16.935883  | ( 3.231724  | -2.537329 | 0.231956)  |
| 17:  | 457.43        | 1.575560   | ( 0.771009  | -0.986641 | 0.087431)  |
| 18:  | 498.79        | 6.055845   | ( -1.882413 | -0.285338 | -1.559150) |
| 19:  | 518.72        | 1.601595   | ( -0.130171 | 1.215992  | -0.325598) |
| 20:  | 592.40        | 127.527496 | ( 8.192437  | 7.176683  | -2.984407) |
| 21:  | 600.11        | 19.729881  | ( -1.176810 | 1.509485  | -4.008298) |
| 22:  | 634.18        | 18.806419  | ( 1.097990  | 2.358918  | 3.469344)  |
| 23:  | 663.12        | 68.591706  | ( 6.318751  | -4.149791 | -3.382946) |
| 24:  | 741.38        | 43.670193  | ( 3.010291  | 4.907426  | -3.244304) |
| 25:  | 771.13        | 17.248144  | ( 3.755962  | 1.491708  | 0.956924)  |
| 26:  | 793.75        | 4.429824   | ( -0.022286 | -1.147085 | 1.764518)  |
| 27:  | 803.66        | 1.376855   | ( 1.016018  | -0.145625 | 0.568643)  |
| 28:  | 872.95        | 9.545867   | ( -1.430529 | 0.035107  | -2.738288) |
| 29:  | 910.66        | 10.588559  | ( 1.018634  | -2.781324 | 1.347287)  |
| 30:  | 919.02        | 3.608628   | ( 1.695913  | -0.069804 | -0.853015) |
| 31:  | 923.01        | 7.511628   | ( 0.608865  | 1.396227  | 2.278478)  |
| 32:  | 984.56        | 5.824620   | ( 1.373566  | -1.422527 | 1.383601)  |
| 33:  | 1020.72       | 41.918629  | ( -4.107515 | 4.192304  | 2.733410)  |
| 34:  | 1041.52       | 2.546074   | ( 0.949004  | -1.273883 | -0.150627) |
| 35:  | 1073.16       | 3.209277   | ( 1.527077  | -0.540693 | 0.764829)  |
| 36:  | 1085.10       | 4.260010   | ( 1.104447  | -1.114956 | 1.340551)  |
| 37:  | 1110.34       | 89.408524  | ( 8.291018  | -4.545746 | -0.061190) |
| 38:  | 1129.68       | 162.699066 | ( 7.618836  | -2.537622 | 9.910241)  |
| 39:  | 1161.14       | 102.325912 | ( -4.450231 | 0.428013  | -9.074038) |
| 40:  | 1190.20       | 140.981300 | ( -6.109290 | 6.427072  | 7.896241)  |
| 41:  | 1245.46       | 2.158733   | ( 1.381593  | 0.497372  | -0.050564) |
| 42:  | 1262.85       | 17.385008  | ( 1.944474  | -0.695702 | 3.622158)  |
| 43:  | 1277.62       | 2.275257   | ( -0.370825 | 1.003748  | 1.063126)  |
| 44:  | 1303.45       | 2.155663   | ( 0.761462  | -0.396929 | 1.190918)  |
| 45:  | 1324.56       | 2.742542   | ( -0.551026 | 1.489577  | 0.469119)  |
| 46:  | 1332.51       | 7.003155   | ( -1.768706 | 1.967931  | 0.045630)  |
| 47:  | 1343.80       | 0.265100   | ( -0.174306 | 0.458786  | -0.155669) |
| 48:  | 1350.10       | 49.254227  | ( 3.015570  | -4.558359 | -4.402491) |
| 49:  | 1361.48       | 16.126252  | ( -2.612978 | 2.859600  | -1.058907) |
| 50:  | 1370.84       | 0.574689   | ( 0.679719  | -0.126505 | 0.310914)  |
| 51:  | 1373.91       | 9.913220   | ( 2.499892  | -0.822077 | 1.728569)  |
| 52:  | 1398.69       | 3.516613   | ( 1.585453  | -0.969273 | 0.251915)  |
| 53:  | 1413.28       | 31.953379  | ( -3.662469 | 3.747494  | -2.120375) |
| 54:  | 1490.91       | 0.350857   | ( -0.233170 | -0.516495 | -0.172401) |
| 55:  | 1494.01       | 5.354559   | ( -1.676454 | -1.522362 | -0.475891) |
| 56:  | 1500.72       | 17.695029  | ( -1.755648 | 2.088670  | 3.201591)  |

|     |         |            |             |            |            |
|-----|---------|------------|-------------|------------|------------|
| 57: | 1508.18 | 0.200989   | ( -0.200271 | 0.388132   | -0.101162) |
| 58: | 1804.86 | 251.866273 | ( 2.893824  | -15.010112 | 4.264808)  |
| 59: | 1806.67 | 390.075362 | ( 7.279251  | 2.279443   | 18.217903) |
| 60: | 3018.31 | 7.021959   | ( -2.455250 | 0.188614   | 0.978842)  |
| 61: | 3029.71 | 16.228107  | ( -2.661754 | -1.809594  | 2.422508)  |
| 62: | 3030.41 | 9.598147   | ( 3.070830  | 0.288615   | -0.291295) |
| 63: | 3032.54 | 18.280818  | ( -0.176119 | 3.191788   | 2.839417)  |
| 64: | 3040.94 | 15.210959  | ( -0.762911 | -3.309395  | -1.917507) |
| 65: | 3049.66 | 2.858730   | ( 1.211057  | -1.014312  | -0.602695) |
| 66: | 3066.46 | 41.216343  | ( -5.482752 | -3.336787  | 0.147062)  |
| 67: | 3072.77 | 3.836888   | ( -0.855882 | -0.123156  | 1.757608)  |
| 68: | 3077.69 | 8.134086   | ( -2.516586 | -1.325054  | 0.212395)  |
| 69: | 3083.34 | 62.480766  | ( 1.129482  | -1.445642  | 7.688638)  |
| 70: | 3745.94 | 70.154142  | ( -5.551985 | 6.263320   | 0.316893)  |
| 71: | 3750.07 | 69.819946  | ( -4.105634 | 6.619351   | 3.024550)  |

The first frequency considered to be a vibration is 6  
The total number of vibrations considered is 66

### HMMM and CHDA

| Mode | freq (cm** <sup>-1</sup> ) | T**2      |             | TX        | TY         | TZ |
|------|----------------------------|-----------|-------------|-----------|------------|----|
| 6:   | 8.95                       | 0.010529  | ( -0.046963 | 0.019642  | 0.089093)  |    |
| 7:   | 16.89                      | 0.460348  | ( 0.488018  | -0.003467 | -0.471354) |    |
| 8:   | 17.91                      | 0.132414  | ( 0.061150  | 0.230115  | 0.275177)  |    |
| 9:   | 20.40                      | 1.293623  | ( 0.844109  | -0.369286 | 0.666881)  |    |
| 10:  | 29.96                      | 0.322325  | ( 0.206470  | 0.479475  | -0.223156) |    |
| 11:  | 33.52                      | 0.452213  | ( -0.671051 | -0.010685 | -0.042301) |    |
| 12:  | 42.85                      | 0.106923  | ( -0.030740 | -0.321548 | 0.050845)  |    |
| 13:  | 53.08                      | 2.419931  | ( 0.941170  | -0.286798 | 1.204939)  |    |
| 14:  | 60.16                      | 2.599109  | ( 1.230813  | 1.028282  | -0.163840) |    |
| 15:  | 69.42                      | 1.938002  | ( 0.322417  | 1.304719  | -0.362986) |    |
| 16:  | 74.58                      | 0.536742  | ( -0.529469 | 0.270651  | -0.427963) |    |
| 17:  | 78.11                      | 2.361456  | ( -0.514205 | -0.849445 | -1.172813) |    |
| 18:  | 86.46                      | 1.792063  | ( 0.699454  | 1.106169  | -0.281455) |    |
| 19:  | 96.09                      | 6.808624  | ( 2.242757  | -0.771106 | -1.088145) |    |
| 20:  | 99.94                      | 3.094298  | ( 0.622315  | 1.581774  | -0.452783) |    |
| 21:  | 116.55                     | 0.346836  | ( 0.494430  | 0.023166  | -0.319122) |    |
| 22:  | 126.96                     | 2.092361  | ( 0.706872  | -1.131459 | -0.559012) |    |
| 23:  | 137.41                     | 1.220543  | ( 0.341457  | 0.965271  | -0.414973) |    |
| 24:  | 137.88                     | 0.138318  | ( 0.139733  | 0.336364  | -0.075179) |    |
| 25:  | 158.71                     | 0.829131  | ( -0.901242 | -0.121371 | 0.046502)  |    |
| 26:  | 160.64                     | 1.616540  | ( -0.603847 | -0.813854 | -0.767822) |    |
| 27:  | 164.53                     | 1.527987  | ( -1.214459 | 0.188509  | 0.132443)  |    |
| 28:  | 169.15                     | 1.182402  | ( -0.424182 | 0.792443  | 0.611969)  |    |
| 29:  | 179.71                     | 1.203903  | ( -0.643436 | -0.602315 | 0.653537)  |    |
| 30:  | 186.13                     | 1.207233  | ( 0.680542  | 0.554100  | 0.661111)  |    |
| 31:  | 197.94                     | 4.641366  | ( 1.510966  | 1.430951  | -0.557431) |    |
| 32:  | 201.89                     | 2.469876  | ( 0.688470  | 0.752049  | -1.195955) |    |
| 33:  | 210.16                     | 3.706260  | ( -0.441137 | -1.530693 | 1.081035)  |    |
| 34:  | 238.52                     | 5.260832  | ( -1.277009 | 1.489915  | 1.187532)  |    |
| 35:  | 250.99                     | 10.869423 | ( -2.573664 | -1.410842 | 1.501733)  |    |
| 36:  | 256.21                     | 1.371197  | ( -0.996495 | 0.208675  | -0.578489) |    |
| 37:  | 265.72                     | 1.077807  | ( -0.013530 | 1.037903  | -0.019516) |    |
| 38:  | 282.04                     | 0.529636  | ( -0.043849 | -0.136083 | 0.713579)  |    |
| 39:  | 293.43                     | 2.117332  | ( -0.468647 | 0.930606  | -1.015713) |    |
| 40:  | 311.67                     | 5.567091  | ( 0.035711  | 2.266806  | -0.653761) |    |
| 41:  | 323.96                     | 0.496293  | ( 0.357740  | -0.141240 | 0.590225)  |    |
| 42:  | 330.37                     | 1.214942  | ( -0.178977 | 0.571961  | 0.925078)  |    |
| 43:  | 361.27                     | 1.729823  | ( 0.224579  | 0.871720  | -0.958901) |    |
| 44:  | 382.16                     | 5.686446  | ( 1.298361  | 1.979491  | -0.286918) |    |
| 45:  | 399.19                     | 2.856353  | ( 0.400345  | 1.572590  | -0.472270) |    |
| 46:  | 432.75                     | 4.974253  | ( -2.104444 | -0.629261 | 0.386779)  |    |
| 47:  | 436.11                     | 18.033386 | ( 1.423678  | 3.931783  | -0.740008) |    |
| 48:  | 457.71                     | 7.533956  | ( 0.188350  | 2.635357  | 0.743890)  |    |
| 49:  | 486.44                     | 0.707370  | ( -0.145856 | -0.827611 | 0.034009)  |    |
| 50:  | 493.14                     | 21.308233 | ( 4.274289  | -0.205489 | -1.731028) |    |
| 51:  | 510.55                     | 1.467199  | ( -0.643436 | 0.989017  | 0.273922)  |    |
| 52:  | 515.33                     | 85.554258 | ( 8.309786  | -3.221772 | -2.474247) |    |
| 53:  | 540.62                     | 14.578756 | ( 3.344972  | 0.965209  | -1.567893) |    |
| 54:  | 560.87                     | 18.720503 | ( -3.578623 | -2.289286 | -0.820446) |    |
| 55:  | 602.88                     | 52.714211 | ( 5.266687  | -3.943651 | 3.069827)  |    |
| 56:  | 611.10                     | 2.521826  | ( -0.735038 | -0.330105 | -1.368421) |    |
| 57:  | 621.91                     | 24.024924 | ( 4.112755  | -2.201714 | 1.504204)  |    |
| 58:  | 640.59                     | 18.205268 | ( -3.900522 | 1.477539  | 0.898930)  |    |
| 59:  | 652.24                     | 42.193758 | ( 3.839680  | 5.044145  | 1.416765)  |    |

|      |         |            |              |            |             |
|------|---------|------------|--------------|------------|-------------|
| 60:  | 718.57  | 10.099635  | ( -3.036943  | -0.738292  | -0.575793)  |
| 61:  | 735.04  | 36.174439  | ( 4.165795   | 3.325947   | -2.785438)  |
| 62:  | 745.72  | 36.311657  | ( -3.483499  | 4.411623   | -2.171283)  |
| 63:  | 756.72  | 10.023814  | ( 1.959988   | 2.457032   | -0.381124)  |
| 64:  | 768.24  | 53.567378  | ( 0.528594   | 7.085864   | -1.754566)  |
| 65:  | 777.06  | 27.072270  | ( -2.251299  | 4.631339   | 0.744728)   |
| 66:  | 783.30  | 15.702827  | ( 1.970440   | 3.262011   | 1.086037)   |
| 67:  | 814.81  | 69.438042  | ( -6.262817  | 5.486098   | 0.343355)   |
| 68:  | 838.96  | 126.081570 | ( -10.967408 | -2.344416  | 0.548862)   |
| 69:  | 854.20  | 56.210451  | ( -4.531328  | -1.057970  | 5.878624)   |
| 70:  | 887.21  | 10.591499  | ( 1.082046   | 2.707382   | -1.445946)  |
| 71:  | 899.79  | 16.669313  | ( -1.052161  | -3.914208  | -0.491167)  |
| 72:  | 911.74  | 4.379524   | ( 1.632398   | 0.061588   | -1.308055)  |
| 73:  | 932.47  | 83.194339  | ( 2.226468   | 8.753426   | -1.270715)  |
| 74:  | 947.75  | 13.248063  | ( 0.406799   | -3.596656  | 0.382941)   |
| 75:  | 955.68  | 139.642845 | ( -2.875815  | -10.849174 | 3.697020)   |
| 76:  | 968.64  | 3.508107   | ( -0.855479  | -0.106152  | 1.662827)   |
| 77:  | 970.12  | 43.296928  | ( 0.809886   | 6.144964   | -2.209169)  |
| 78:  | 981.73  | 9.837167   | ( -2.368725  | -1.416676  | 1.489744)   |
| 79:  | 989.84  | 45.441574  | ( 2.816519   | -3.262354  | -5.183227)  |
| 80:  | 1001.52 | 14.938304  | ( 0.197672   | 3.841214   | 0.379877)   |
| 81:  | 1012.71 | 28.001873  | ( 3.361522   | 3.821530   | -1.448429)  |
| 82:  | 1024.82 | 96.010048  | ( -4.107406  | -8.323389  | 3.140137)   |
| 83:  | 1029.06 | 85.187581  | ( 4.956533   | -7.078827  | -3.242001)  |
| 84:  | 1045.59 | 3.912029   | ( 0.375334   | -1.517631  | -1.211590)  |
| 85:  | 1050.49 | 60.848252  | ( 5.635076   | -1.838157  | -5.071031)  |
| 86:  | 1079.80 | 5.774725   | ( -1.185121  | -2.090502  | 0.004120)   |
| 87:  | 1099.33 | 100.790596 | ( -3.819386  | -8.998472  | 2.287004)   |
| 88:  | 1100.31 | 173.474040 | ( -4.042223  | -3.788488  | -11.949135) |
| 89:  | 1106.94 | 73.756951  | ( 0.457525   | -3.454408  | -7.849502)  |
| 90:  | 1121.81 | 34.852204  | ( 1.869819   | 5.592790   | -0.276908)  |
| 91:  | 1132.65 | 0.556677   | ( -0.002614  | -0.636371  | 0.389490)   |
| 92:  | 1142.68 | 301.920998 | ( -3.507933  | -14.112994 | 9.509932)   |
| 93:  | 1154.19 | 162.818521 | ( -8.042374  | -8.671312  | 4.790312)   |
| 94:  | 1160.56 | 97.049932  | ( 6.018406   | 6.200344   | -4.731222)  |
| 95:  | 1169.46 | 7.325383   | ( 2.087942   | 1.435946   | -0.950757)  |
| 96:  | 1170.35 | 2.206454   | ( 1.096927   | -0.913434  | 0.410904)   |
| 97:  | 1172.57 | 3.758418   | ( 1.555971   | 0.493593   | 1.045820)   |
| 98:  | 1174.25 | 1.429572   | ( -0.794514  | -0.798657  | -0.400584)  |
| 99:  | 1175.40 | 1.695204   | ( -1.300070  | 0.059939   | 0.037791)   |
| 100: | 1184.22 | 37.560201  | ( 3.657373   | -0.027053  | -4.917631)  |
| 101: | 1210.18 | 31.566030  | ( -0.179412  | -0.915466  | -5.540376)  |
| 102: | 1213.00 | 3.791524   | ( 1.516378   | -0.327079  | 1.176921)   |
| 103: | 1215.77 | 5.045618   | ( -0.671677  | -1.368698  | -1.649586)  |
| 104: | 1216.96 | 3.636852   | ( -0.336597  | 1.306587   | -1.347734)  |
| 105: | 1237.48 | 69.832898  | ( 2.136011   | -7.751853  | 2.275771)   |
| 106: | 1245.34 | 21.469813  | ( 3.656013   | -2.809088  | -0.460879)  |
| 107: | 1255.26 | 40.538078  | ( 3.027342   | 4.537166   | -3.284419)  |
| 108: | 1270.35 | 9.785641   | ( -0.500237  | -3.084404  | 0.147845)   |
| 109: | 1278.43 | 18.031978  | ( -2.789671  | -2.378709  | 2.142769)   |
| 110: | 1284.19 | 86.447172  | ( -2.726495  | -8.522299  | -2.526622)  |
| 111: | 1307.45 | 21.132876  | ( 0.264776   | -3.382911  | -3.101400)  |
| 112: | 1323.58 | 3.416192   | ( 0.601533   | 0.445331   | -1.689979)  |
| 113: | 1343.82 | 132.514305 | ( 9.447781   | 5.835193   | -3.033852)  |
| 114: | 1347.08 | 2.520854   | ( -1.340236  | -0.124557  | 0.842085)   |
| 115: | 1357.33 | 19.593519  | ( -1.967921  | -2.682920  | 2.919374)   |
| 116: | 1357.90 | 43.293533  | ( -0.451813  | -5.821588  | -3.032904)  |
| 117: | 1372.54 | 2.143786   | ( 0.650800   | -0.706100  | -1.105291)  |
| 118: | 1381.07 | 51.821779  | ( -0.426934  | 4.258778   | 5.788118)   |
| 119: | 1382.49 | 44.650387  | ( 3.824654   | -5.140525  | 1.896683)   |
| 120: | 1392.74 | 399.735324 | ( -17.602740 | 7.534936   | 5.753573)   |
| 121: | 1406.35 | 23.630081  | ( 0.585029   | 1.143998   | -4.688186)  |
| 122: | 1413.57 | 36.336028  | ( -1.748713  | -5.761304  | 0.292248)   |
| 123: | 1424.69 | 30.696803  | ( -3.098109  | -4.583265  | 0.303653)   |
| 124: | 1447.55 | 121.692943 | ( 1.718472   | 10.825902  | -1.240828)  |
| 125: | 1457.47 | 1.568735   | ( 0.737288   | 1.001848   | -0.146433)  |
| 126: | 1458.71 | 13.745913  | ( 0.884752   | -3.600314  | -0.029434)  |
| 127: | 1461.42 | 2.102279   | ( -1.262873  | 0.094045   | -0.706105)  |
| 128: | 1473.79 | 4.222316   | ( -0.730815  | 1.803281   | -0.660607)  |
| 129: | 1476.40 | 2.132841   | ( -1.360357  | -0.018090  | -0.530984)  |
| 130: | 1478.86 | 4.331388   | ( -0.176039  | -1.542993  | -1.385486)  |
| 131: | 1481.65 | 2.687571   | ( 1.319893   | 0.943282   | -0.235946)  |
| 132: | 1481.91 | 10.288022  | ( 3.046081   | 0.872976   | 0.497316)   |
| 133: | 1485.56 | 4.511734   | ( 1.817690   | 0.031909   | -1.098507)  |
| 134: | 1493.20 | 4.882109   | ( -1.451823  | -1.595187  | 0.479266)   |
| 135: | 1494.87 | 3.264905   | ( -1.046961  | -1.407038  | 0.434767)   |
| 136: | 1496.15 | 4.093974   | ( 0.080003   | 1.685506   | 1.116531)   |
| 137: | 1503.01 | 3.688206   | ( 1.680843   | -0.568727  | 0.734523)   |
| 138: | 1504.33 | 9.200930   | ( 0.590598   | -2.294467  | 1.894082)   |

|      |         |            |              |           |            |
|------|---------|------------|--------------|-----------|------------|
| 139: | 1505.35 | 4.111813   | ( 0.035482   | -1.915267 | -0.665061) |
| 140: | 1508.65 | 5.152198   | ( -1.219145  | -1.901144 | -0.227010) |
| 141: | 1508.90 | 3.945727   | ( -0.994087  | 1.466624  | -0.898072) |
| 142: | 1510.37 | 8.346785   | ( -1.253268  | 0.523238  | -2.549966) |
| 143: | 1519.23 | 6.264780   | ( -0.303913  | -1.108392 | 2.223484)  |
| 144: | 1581.47 | 363.224652 | ( -1.087550  | 18.967045 | -1.514292) |
| 145: | 1589.66 | 621.502478 | ( -24.388646 | -0.439324 | 5.148147)  |
| 146: | 1803.18 | 278.447267 | ( -8.372805  | 2.624169  | 14.193560) |
| 147: | 2936.36 | 32.882401  | ( -5.731816  | -0.052133 | 0.161161)  |
| 148: | 2979.26 | 49.512978  | ( -4.443447  | -0.606318 | -5.422281) |
| 149: | 2988.30 | 69.961083  | ( 5.589440   | 5.746081  | -2.387844) |
| 150: | 3016.23 | 16.846812  | ( 1.402225   | 3.486175  | -1.651413) |
| 151: | 3019.79 | 76.026447  | ( 5.505191   | -4.312986 | -5.207443) |
| 152: | 3020.17 | 3.238209   | ( -0.631764  | 1.059631  | -1.310063) |
| 153: | 3026.72 | 49.178987  | ( -3.741154  | -5.159872 | 2.925488)  |
| 154: | 3030.58 | 29.487312  | ( -4.275512  | -2.664626 | -2.026592) |
| 155: | 3030.91 | 2.779929   | ( -0.887540  | 0.580248  | -1.286668) |
| 156: | 3035.13 | 41.967057  | ( 3.645201   | -4.609566 | -2.726072) |
| 157: | 3039.31 | 19.092071  | ( -3.593302  | 0.536951  | 2.427331)  |
| 158: | 3045.22 | 1.657873   | ( 0.493833   | 1.042607  | 0.571815)  |
| 159: | 3048.23 | 19.451693  | ( 2.884459   | -2.122774 | 2.573989)  |
| 160: | 3063.59 | 35.107559  | ( -3.585472  | 4.710907  | -0.243528) |
| 161: | 3064.74 | 3.531258   | ( 0.443632   | 0.183175  | -1.816837) |
| 162: | 3069.25 | 17.542182  | ( 3.905292   | -1.427089 | 0.504276)  |
| 163: | 3083.60 | 5.944602   | ( -2.002877  | 1.372026  | 0.225006)  |
| 164: | 3084.48 | 37.433189  | ( -5.195559  | -3.046729 | -1.075547) |
| 165: | 3087.68 | 22.945167  | ( 2.762910   | -3.882025 | 0.491303)  |
| 166: | 3091.14 | 37.816584  | ( -0.693746  | -2.342786 | 5.643284)  |
| 167: | 3109.40 | 23.111393  | ( 1.821424   | -3.635160 | -2.565037) |
| 168: | 3113.05 | 15.264424  | ( -3.505247  | -1.630211 | -0.565756) |
| 169: | 3117.64 | 14.445723  | ( 3.284266   | 0.750197  | 1.759695)  |
| 170: | 3118.90 | 19.760469  | ( 1.264376   | -0.126134 | 4.259802)  |
| 171: | 3122.83 | 14.864901  | ( 0.237491   | 2.406985  | -3.002486) |
| 172: | 3130.83 | 8.470911   | ( 1.501759   | -1.312989 | 2.119361)  |
| 173: | 3739.63 | 73.151841  | ( 1.863341   | 7.847489  | 2.845473)  |

The first frequency considered to be a vibration is 6  
The total number of vibrations considered is 168

### DDSA

| Mode | freq (cm**-1) | T**2      | TX          | TY        | TZ         |
|------|---------------|-----------|-------------|-----------|------------|
| 6:   | 20.38         | 0.722560  | ( 0.733580  | 0.372671  | 0.213393)  |
| 7:   | 27.37         | 0.860895  | ( -0.350914 | -0.832932 | -0.209710) |
| 8:   | 58.23         | 0.929235  | ( -0.137936 | -0.354103 | 0.885901)  |
| 9:   | 63.07         | 0.891133  | ( 0.395052  | 0.714781  | -0.473451) |
| 10:  | 71.97         | 0.654951  | ( 0.114163  | -0.797417 | 0.077745)  |
| 11:  | 94.03         | 1.250053  | ( -0.028203 | -0.632820 | -0.921301) |
| 12:  | 105.98        | 0.201852  | ( -0.400897 | -0.178644 | 0.096024)  |
| 13:  | 123.81        | 2.006760  | ( 0.429612  | -1.017577 | -0.886978) |
| 14:  | 159.43        | 1.883089  | ( 1.119237  | -0.109636 | -0.786370) |
| 15:  | 169.83        | 0.204636  | ( -0.098423 | -0.431560 | -0.093299) |
| 16:  | 202.15        | 0.124954  | ( -0.192455 | -0.083596 | -0.284477) |
| 17:  | 206.50        | 3.481066  | ( 1.414350  | -0.610306 | 1.052713)  |
| 18:  | 219.76        | 0.984025  | ( -0.485020 | 0.264546  | -0.823890) |
| 19:  | 227.75        | 0.473019  | ( -0.269531 | -0.177832 | 0.607247)  |
| 20:  | 250.20        | 1.670119  | ( 1.189084  | 0.287922  | 0.416292)  |
| 21:  | 252.01        | 0.064084  | ( -0.239423 | -0.070547 | 0.042237)  |
| 22:  | 253.31        | 0.087341  | ( -0.208237 | -0.070416 | -0.197535) |
| 23:  | 280.62        | 1.298558  | ( 0.861955  | -0.018763 | 0.745145)  |
| 24:  | 284.81        | 2.632508  | ( -1.583228 | -0.353492 | 0.030659)  |
| 25:  | 325.67        | 1.460255  | ( 0.279479  | 0.194899  | -1.159379) |
| 26:  | 357.16        | 1.140909  | ( 0.964867  | 0.342486  | -0.304374) |
| 27:  | 397.24        | 9.018744  | ( 2.742889  | 1.002830  | -0.699741) |
| 28:  | 420.03        | 3.368334  | ( 1.508768  | 1.044501  | -0.031151) |
| 29:  | 451.60        | 0.005045  | ( -0.038092 | -0.027714 | 0.053164)  |
| 30:  | 457.81        | 10.867742 | ( -3.135658 | -0.852255 | 0.555923)  |
| 31:  | 479.81        | 3.416187  | ( -1.507202 | -0.861660 | -0.634091) |
| 32:  | 498.31        | 0.067922  | ( 0.002732  | 0.126001  | -0.228119) |
| 33:  | 535.64        | 15.207689 | ( -2.778352 | 0.435667  | 2.701601)  |
| 34:  | 555.65        | 4.224830  | ( 2.055228  | 0.019603  | -0.021979) |
| 35:  | 588.57        | 14.526663 | ( 2.874568  | -2.413999 | -0.660405) |
| 36:  | 603.54        | 12.847773 | ( -2.971026 | 1.067625  | 1.697337)  |
| 37:  | 658.74        | 62.401955 | ( 7.319419  | -1.905729 | -2.279530) |
| 38:  | 678.57        | 2.511778  | ( -0.994935 | -0.109851 | 1.228745)  |

|      |         |            |   |           |           |            |
|------|---------|------------|---|-----------|-----------|------------|
| 39:  | 749.63  | 23.547449  | ( | 4.696380  | -0.776771 | 0.942385)  |
| 40:  | 812.81  | 10.292390  | ( | -2.407197 | -0.104613 | 2.118218)  |
| 41:  | 819.16  | 7.716320   | ( | 2.468510  | -1.062460 | -0.702820) |
| 42:  | 824.24  | 2.133874   | ( | -0.639909 | -0.489915 | 1.218349)  |
| 43:  | 834.45  | 6.661600   | ( | 2.271044  | -1.172385 | -0.359822) |
| 44:  | 846.53  | 42.755464  | ( | 4.070804  | -4.964510 | -1.240024) |
| 45:  | 851.99  | 14.527618  | ( | -0.259967 | 3.786235  | 0.352791)  |
| 46:  | 883.65  | 85.995497  | ( | -6.854092 | 5.325544  | 3.264277)  |
| 47:  | 890.03  | 98.592150  | ( | 8.692302  | -4.180670 | -2.357548) |
| 48:  | 901.93  | 34.883157  | ( | 5.544741  | -1.575475 | -1.287199) |
| 49:  | 922.71  | 0.282514   | ( | -0.048397 | -0.505584 | -0.156704) |
| 50:  | 933.97  | 5.093243   | ( | -2.195468 | 0.357785  | -0.380988) |
| 51:  | 969.04  | 14.674995  | ( | 3.187011  | 0.171857  | 2.118590)  |
| 52:  | 987.75  | 17.659106  | ( | 2.986207  | 1.133450  | 2.730744)  |
| 53:  | 997.61  | 0.665512   | ( | 0.236516  | 0.002880  | 0.780746)  |
| 54:  | 1009.51 | 9.524652   | ( | 2.716975  | 1.456763  | 0.143323)  |
| 55:  | 1014.85 | 0.262088   | ( | -0.210376 | 0.247500  | -0.395694) |
| 56:  | 1018.37 | 12.903219  | ( | -0.431251 | -3.155738 | -1.660892) |
| 57:  | 1027.47 | 0.013420   | ( | 0.051735  | 0.102475  | 0.015575)  |
| 58:  | 1036.40 | 0.789092   | ( | -0.105070 | -0.270751 | 0.839491)  |
| 59:  | 1047.89 | 0.102922   | ( | -0.301821 | -0.108291 | 0.009947)  |
| 60:  | 1053.76 | 1.478268   | ( | -0.969027 | -0.705857 | -0.202531) |
| 61:  | 1062.44 | 13.150736  | ( | -3.546085 | -0.654043 | 0.385024)  |
| 62:  | 1068.20 | 0.840087   | ( | -0.599836 | -0.684223 | -0.110101) |
| 63:  | 1085.50 | 10.654625  | ( | 3.031467  | 1.174164  | -0.293546) |
| 64:  | 1104.69 | 0.322877   | ( | -0.507693 | 0.254267  | -0.021763) |
| 65:  | 1123.92 | 8.063681   | ( | 2.320282  | 1.626605  | -0.184737) |
| 66:  | 1150.71 | 13.947298  | ( | 3.591570  | -0.008558 | -1.023646) |
| 67:  | 1163.51 | 34.045253  | ( | 5.220003  | 1.100615  | -2.363360) |
| 68:  | 1170.31 | 0.207020   | ( | 0.128456  | -0.356001 | 0.252552)  |
| 69:  | 1223.86 | 3.484796   | ( | 1.775545  | 0.549683  | 0.173450)  |
| 70:  | 1237.79 | 125.468801 | ( | 10.117778 | 4.801591  | -0.209989) |
| 71:  | 1251.70 | 14.630482  | ( | -3.451610 | -1.608975 | 0.357865)  |
| 72:  | 1260.75 | 24.035923  | ( | -4.749064 | -1.199007 | 0.211425)  |
| 73:  | 1275.50 | 1.236957   | ( | 0.944825  | 0.583839  | -0.058273) |
| 74:  | 1281.42 | 36.691711  | ( | 5.771841  | 1.820519  | -0.251542) |
| 75:  | 1294.34 | 0.127885   | ( | 0.306524  | 0.180172  | -0.038289) |
| 76:  | 1304.31 | 1.453032   | ( | -0.646102 | 1.014045  | -0.085418) |
| 77:  | 1316.41 | 14.434786  | ( | 1.989177  | 3.197191  | 0.505897)  |
| 78:  | 1324.30 | 98.818925  | ( | -8.676757 | -4.850524 | 0.072273)  |
| 79:  | 1326.55 | 26.883666  | ( | 3.497393  | 3.827741  | -0.017537) |
| 80:  | 1333.70 | 1.065254   | ( | 0.625662  | 0.378203  | -0.728536) |
| 81:  | 1344.72 | 0.336414   | ( | 0.378952  | 0.201704  | 0.390031)  |
| 82:  | 1346.04 | 0.862417   | ( | 0.095853  | 0.923599  | -0.013916) |
| 83:  | 1354.21 | 0.610497   | ( | -0.122424 | -0.732228 | -0.243622) |
| 84:  | 1357.14 | 0.282124   | ( | -0.357195 | -0.303159 | 0.250261)  |
| 85:  | 1359.79 | 0.479556   | ( | 0.440983  | 0.255412  | -0.468886) |
| 86:  | 1380.12 | 3.789679   | ( | -1.796768 | -0.744746 | 0.081575)  |
| 87:  | 1382.37 | 4.791722   | ( | 1.376565  | 1.701973  | -0.008934) |
| 88:  | 1403.99 | 7.653571   | ( | 2.471105  | 1.136292  | -0.506018) |
| 89:  | 1410.73 | 2.057119   | ( | -1.425778 | -0.155756 | -0.003905) |
| 90:  | 1414.84 | 0.115730   | ( | -0.058998 | -0.189780 | -0.276103) |
| 91:  | 1419.45 | 0.138651   | ( | 0.008904  | 0.067598  | 0.366063)  |
| 92:  | 1423.75 | 10.609956  | ( | 3.220934  | -0.081331 | -0.478463) |
| 93:  | 1436.49 | 2.187201   | ( | -1.271008 | -0.338441 | -0.676165) |
| 94:  | 1481.64 | 2.393461   | ( | 0.535143  | -1.320686 | 0.602388)  |
| 95:  | 1489.82 | 0.769971   | ( | -0.680996 | 0.195299  | -0.517758) |
| 96:  | 1490.83 | 2.951495   | ( | -0.097380 | -1.630835 | -0.531403) |
| 97:  | 1490.97 | 0.108718   | ( | -0.297887 | -0.026367 | -0.138876) |
| 98:  | 1493.14 | 1.115953   | ( | 0.730942  | -0.112239 | 0.754374)  |
| 99:  | 1495.10 | 0.670594   | ( | -0.793339 | 0.187779  | -0.077114) |
| 100: | 1498.84 | 0.321514   | ( | -0.534756 | 0.161002  | -0.098124) |
| 101: | 1506.32 | 0.664670   | ( | 0.148136  | -0.757712 | -0.261914) |
| 102: | 1512.17 | 3.798044   | ( | 0.527733  | -1.674707 | 0.845516)  |
| 103: | 1513.47 | 6.258450   | ( | -0.412882 | -1.417823 | 2.019345)  |
| 104: | 1515.18 | 1.392254   | ( | 1.071709  | -0.288225 | 0.400774)  |
| 105: | 1520.20 | 8.981652   | ( | 1.036967  | 2.165533  | 1.793549)  |
| 106: | 1613.83 | 470.934238 | ( | 20.567886 | -2.839100 | -6.311561) |
| 107: | 1653.67 | 9.447273   | ( | -3.070820 | -0.062693 | -0.115790) |
| 108: | 1727.56 | 136.145954 | ( | -4.348315 | 10.775020 | -1.066325) |
| 109: | 2842.89 | 4.155474   | ( | 1.927574  | -0.304132 | 0.589436)  |
| 110: | 2844.39 | 3.481349   | ( | 1.776691  | -0.466242 | 0.327620)  |
| 111: | 2845.18 | 4.326214   | ( | 1.948091  | -0.357696 | 0.634988)  |
| 112: | 2848.50 | 0.415404   | ( | 0.053482  | 0.477396  | -0.429694) |
| 113: | 2849.73 | 0.832463   | ( | -0.467842 | 0.745379  | 0.240826)  |
| 114: | 2853.77 | 9.136376   | ( | -0.326798 | -2.955208 | -0.544355) |
| 115: | 2856.96 | 10.699042  | ( | -1.636053 | 2.832377  | -0.003521) |
| 116: | 2859.57 | 26.901965  | ( | -1.670867 | 2.016747  | -4.476929) |
| 117: | 2860.42 | 56.621836  | ( | -6.133148 | 3.161225  | -3.002165) |



|      |         |            |             |           |            |
|------|---------|------------|-------------|-----------|------------|
| 118: | 2863.55 | 157.758592 | ( 6.660319  | 9.053342  | 5.606759)  |
| 119: | 2868.88 | 13.564817  | ( 2.275045  | -1.951090 | -2.140616) |
| 120: | 2868.96 | 2.457602   | ( 0.221869  | 1.284704  | 0.870581)  |
| 121: | 2874.36 | 6.876179   | ( 1.029736  | 1.300129  | 2.031130)  |
| 122: | 2876.95 | 8.722840   | ( 0.209605  | 2.904470  | 0.492908)  |
| 123: | 2879.56 | 8.875800   | ( -0.385261 | 0.427512  | -2.923116) |
| 124: | 2886.17 | 4.386866   | ( 0.882133  | 0.671136  | 1.777156)  |
| 125: | 2890.18 | 6.744894   | ( 0.053351  | -0.745656 | 2.487176)  |
| 126: | 2905.30 | 1.959359   | ( 0.000692  | 0.817809  | -1.136022) |
| 127: | 2916.85 | 99.113039  | ( -2.983967 | 2.487125  | 9.166416)  |
| 128: | 2917.63 | 48.840036  | ( -1.552198 | 6.049545  | 3.135877)  |
| 129: | 2921.23 | 36.878943  | ( -1.266413 | -5.648491 | 1.835671)  |
| 130: | 2926.00 | 155.489496 | ( -3.187936 | -6.802208 | 9.952715)  |
| 131: | 2931.77 | 10.599849  | ( 1.170013  | 3.018655  | -0.344439) |
| 132: | 2947.67 | 4.185297   | ( 0.719830  | -0.381652 | -1.876562) |
| 133: | 3089.99 | 13.377090  | ( 1.077050  | -3.304957 | 1.137678)  |
| 134: | 3135.59 | 1.237003   | ( -0.124121 | 1.075308  | -0.255557) |

The first frequency considered to be a vibration is 6  
The total number of vibrations considered is 129

### TMA

| Mode | freq (cm**-1) | T**2       | TX           | TY         | TZ         |
|------|---------------|------------|--------------|------------|------------|
| 6:   | 85.30         | 1.718799   | ( -0.086239  | 0.434462   | 1.233939)  |
| 7:   | 120.93        | 2.886238   | ( -0.183780  | 1.613766   | 0.498219)  |
| 8:   | 142.04        | 1.773459   | ( 0.965480   | 0.545289   | -0.737541) |
| 9:   | 194.61        | 1.205479   | ( -0.890502  | -0.340110  | 0.544803)  |
| 10:  | 203.74        | 3.543077   | ( -0.075807  | -0.207304  | -1.869319) |
| 11:  | 228.95        | 1.414320   | ( -0.318330  | 0.314753   | -1.101779) |
| 12:  | 275.81        | 2.767159   | ( 0.547549   | -1.319411  | 0.852352)  |
| 13:  | 348.15        | 2.292951   | ( 0.758635   | -1.164320  | -0.601484) |
| 14:  | 414.36        | 6.267083   | ( -0.415347  | 2.033985   | -1.399099) |
| 15:  | 445.27        | 2.966034   | ( -1.519197  | -0.022617  | -0.810902) |
| 16:  | 452.29        | 11.937683  | ( -1.142638  | -3.247387  | 0.294172)  |
| 17:  | 548.51        | 7.269649   | ( -1.561512  | 2.122822   | 0.570049)  |
| 18:  | 572.65        | 4.019440   | ( -0.621685  | -1.864713  | -0.394706) |
| 19:  | 616.25        | 17.985227  | ( -3.166150  | -2.773066  | 0.520408)  |
| 20:  | 658.74        | 1.657603   | ( -0.510322  | 1.180578   | -0.058406) |
| 21:  | 692.51        | 17.991664  | ( 1.546096   | 3.750299   | 1.239558)  |
| 22:  | 694.40        | 8.202146   | ( 1.599148   | 1.781516   | -1.571965) |
| 23:  | 755.78        | 47.290108  | ( -0.084663  | 1.639785   | 6.677877)  |
| 24:  | 764.02        | 9.973900   | ( -1.500077  | 1.216295   | -2.498859) |
| 25:  | 776.15        | 2.858419   | ( 0.726594   | -1.223363  | -0.913161) |
| 26:  | 802.61        | 18.038463  | ( -1.412230  | -3.956638  | -0.623768) |
| 27:  | 825.71        | 5.011175   | ( 0.221010   | 2.214204   | -0.244194) |
| 28:  | 875.67        | 8.460037   | ( -1.246441  | 1.930476   | -1.783167) |
| 29:  | 905.93        | 64.371007  | ( 5.244688   | 1.837368   | -5.786910) |
| 30:  | 924.64        | 66.694363  | ( 2.807096   | -3.192301  | -6.973076) |
| 31:  | 947.76        | 19.449747  | ( 1.027608   | -0.478648  | -4.262003) |
| 32:  | 1004.61       | 2.666234   | ( -0.993445  | -1.295218  | -0.041371) |
| 33:  | 1043.91       | 116.314190 | ( -9.865320  | -4.348103  | 0.289217)  |
| 34:  | 1066.11       | 63.571565  | ( 6.199967   | -4.972395  | 0.638167)  |
| 35:  | 1121.33       | 56.115720  | ( -6.496614  | -3.695679  | 0.501684)  |
| 36:  | 1161.01       | 24.364899  | ( 4.839376   | 0.934610   | -0.268033) |
| 37:  | 1204.21       | 164.593512 | ( 10.795956  | 6.847681   | -1.072433) |
| 38:  | 1249.23       | 391.359672 | ( -12.215940 | -15.426562 | 2.037569)  |
| 39:  | 1290.05       | 117.715105 | ( -4.235570  | -9.902056  | 1.313137)  |
| 40:  | 1317.35       | 58.730533  | ( -3.604192  | 6.742427   | -0.529166) |
| 41:  | 1356.44       | 47.065625  | ( 2.990666   | 6.170914   | 0.203377)  |
| 42:  | 1373.84       | 151.477150 | ( 3.570468   | -11.771252 | 0.408085)  |
| 43:  | 1429.53       | 40.208586  | ( -0.847614  | -6.062556  | 1.653951)  |
| 44:  | 1509.64       | 15.551878  | ( -0.372408  | -3.904547  | 0.409519)  |
| 45:  | 1591.90       | 197.835821 | ( 8.969875   | -4.936931  | 9.643851)  |
| 46:  | 1615.82       | 60.919624  | ( -5.200102  | 4.679044   | -3.461952) |
| 47:  | 1653.05       | 7.452678   | ( 2.207171   | 1.243352   | 1.017423)  |
| 48:  | 1680.61       | 578.648972 | ( 24.037844  | 0.902932   | -0.125421) |
| 49:  | 1759.86       | 194.452669 | ( 0.062765   | -13.878171 | 1.358343)  |
| 50:  | 3005.06       | 151.042770 | ( -5.008413  | -10.769667 | 3.157980)  |
| 51:  | 3186.49       | 0.308837   | ( 0.249021   | -0.438486  | 0.233570)  |
| 52:  | 3190.14       | 1.226682   | ( 0.964871   | -0.521341  | 0.154623)  |
| 53:  | 3198.41       | 0.204461   | ( -0.000432  | -0.417585  | -0.173446) |

The first frequency considered to be a vibration is 6  
The total number of vibrations considered is 48

## TMA and NPG

| Mode | freq (cm** <sup>-1</sup> ) | T**2       | TX          | TY        | TZ         |
|------|----------------------------|------------|-------------|-----------|------------|
| 6:   | 34.59                      | 0.407101   | ( -0.301513 | 0.553004  | -0.101871) |
| 7:   | 48.66                      | 0.342561   | ( 0.480069  | -0.192763 | 0.273747)  |
| 8:   | 49.24                      | 0.320507   | ( -0.331229 | -0.369142 | 0.273000)  |
| 9:   | 68.01                      | 0.699190   | ( 0.481768  | 0.189851  | -0.656541) |
| 10:  | 74.33                      | 0.347965   | ( 0.524316  | 0.017752  | -0.269710) |
| 11:  | 88.16                      | 0.315510   | ( -0.468430 | -0.117017 | -0.287037) |
| 12:  | 89.41                      | 0.096129   | ( 0.242144  | 0.180811  | 0.069298)  |
| 13:  | 99.75                      | 1.595050   | ( -1.210327 | -0.244050 | -0.265703) |
| 14:  | 109.77                     | 0.195020   | ( 0.175772  | -0.137843 | 0.380951)  |
| 15:  | 119.74                     | 0.559538   | ( -0.525222 | -0.466977 | -0.256149) |
| 16:  | 129.62                     | 4.125671   | ( 0.836173  | 1.449581  | -1.151173) |
| 17:  | 146.40                     | 1.362147   | ( -0.665459 | 0.914832  | 0.287041)  |
| 18:  | 154.93                     | 3.008243   | ( -0.280178 | -1.710059 | -0.073760) |
| 19:  | 158.48                     | 1.068490   | ( -0.893890 | 0.467012  | -0.226604) |
| 20:  | 181.48                     | 2.866517   | ( 1.407368  | 0.137202  | 0.931133)  |
| 21:  | 187.02                     | 6.221860   | ( 1.697063  | 0.947501  | 1.563355)  |
| 22:  | 207.29                     | 0.474789   | ( 0.204343  | -0.048464 | -0.656265) |
| 23:  | 217.77                     | 4.119257   | ( -1.124066 | -1.645828 | 0.383381)  |
| 24:  | 231.52                     | 0.635721   | ( 0.785927  | -0.099354 | -0.090376) |
| 25:  | 255.59                     | 0.910489   | ( -0.812428 | 0.495802  | -0.068051) |
| 26:  | 274.35                     | 1.893607   | ( 0.494147  | 0.386649  | -1.224715) |
| 27:  | 289.70                     | 6.284296   | ( -0.414234 | 2.337400  | 0.805770)  |
| 28:  | 297.87                     | 1.682287   | ( -1.181113 | -0.534744 | 0.036173)  |
| 29:  | 330.68                     | 2.423950   | ( 1.485028  | -0.456272 | -0.102269) |
| 30:  | 339.97                     | 2.825032   | ( -0.426596 | 1.625253  | -0.039999) |
| 31:  | 354.17                     | 2.145017   | ( 1.243483  | -0.755178 | -0.168735) |
| 32:  | 369.72                     | 9.655429   | ( 0.358555  | 2.578302  | -1.696829) |
| 33:  | 378.58                     | 6.202738   | ( 0.532360  | -2.288527 | 0.825818)  |
| 34:  | 391.57                     | 2.174252   | ( 0.983194  | -0.673265 | 0.868502)  |
| 35:  | 408.86                     | 0.571471   | ( 0.560065  | 0.497701  | -0.100459) |
| 36:  | 419.39                     | 4.544456   | ( -0.694855 | 2.001672  | -0.234400) |
| 37:  | 430.84                     | 11.245806  | ( -2.408198 | -2.088260 | 1.041902)  |
| 38:  | 435.76                     | 24.093452  | ( 1.273359  | 4.569518  | -1.261552) |
| 39:  | 441.41                     | 13.570756  | ( -1.149354 | -2.808431 | 2.088649)  |
| 40:  | 444.52                     | 0.388303   | ( -0.428857 | -0.040442 | 0.450277)  |
| 41:  | 454.65                     | 17.738007  | ( 2.209593  | 3.034661  | -1.909592) |
| 42:  | 459.15                     | 2.318619   | ( -0.473363 | -1.023553 | 1.023174)  |
| 43:  | 464.20                     | 6.635404   | ( -0.733092 | 2.460281  | 0.212130)  |
| 44:  | 464.87                     | 0.976756   | ( -0.887349 | -0.355829 | -0.250506) |
| 45:  | 470.79                     | 84.392771  | ( -4.468463 | -7.913627 | 1.341684)  |
| 46:  | 472.78                     | 3.807416   | ( 0.357426  | -0.356327 | 1.884859)  |
| 47:  | 509.32                     | 14.183697  | ( 1.210288  | 2.209761  | -2.799260) |
| 48:  | 548.52                     | 71.762379  | ( -5.086816 | -6.555230 | 1.707526)  |
| 49:  | 592.13                     | 113.115700 | ( -4.547442 | -9.416245 | 1.941858)  |
| 50:  | 604.88                     | 10.632892  | ( 1.303273  | 2.833508  | 0.951632)  |
| 51:  | 616.28                     | 14.777113  | ( -0.131214 | -3.770918 | 0.734896)  |
| 52:  | 623.72                     | 6.003181   | ( -2.391338 | 0.518169  | -0.127220) |
| 53:  | 636.31                     | 4.784077   | ( 1.084433  | -0.816893 | 1.714867)  |
| 54:  | 678.25                     | 86.693223  | ( 4.525545  | -8.125394 | 0.436628)  |
| 55:  | 682.36                     | 96.489182  | ( 1.095162  | 9.185170  | -3.304914) |
| 56:  | 689.26                     | 37.291755  | ( -1.477845 | -2.631309 | 5.308855)  |
| 57:  | 707.43                     | 21.349985  | ( -0.376632 | -4.544222 | -0.747111) |
| 58:  | 713.65                     | 75.952226  | ( -4.512283 | 5.838625  | 4.637023)  |
| 59:  | 731.23                     | 137.533551 | ( 0.752964  | 8.872857  | -7.631448) |
| 60:  | 740.25                     | 7.408597   | ( 1.417204  | -2.214861 | 0.703224)  |
| 61:  | 748.43                     | 24.216197  | ( -3.820845 | 2.134064  | 2.250135)  |
| 62:  | 778.14                     | 34.297176  | ( 2.641243  | 4.405711  | -2.812601) |
| 63:  | 789.47                     | 74.309942  | ( 8.583641  | 0.271845  | -0.746430) |
| 64:  | 796.43                     | 75.909645  | ( 8.261391  | -2.236006 | -1.630748) |
| 65:  | 816.03                     | 19.658707  | ( 1.896850  | -4.005211 | -0.137682) |
| 66:  | 871.54                     | 315.787854 | ( 3.619815  | 17.392539 | 0.429401)  |
| 67:  | 879.04                     | 11.440096  | ( 1.527291  | 1.281112  | -2.732440) |
| 68:  | 897.06                     | 1.022811   | ( 0.910154  | 0.431937  | 0.088666)  |
| 69:  | 910.99                     | 20.147613  | ( 3.736748  | -2.388252 | 0.693236)  |
| 70:  | 917.28                     | 0.790765   | ( -0.374810 | 0.736290  | -0.328877) |
| 71:  | 920.85                     | 1.461399   | ( -1.156436 | 0.298409  | 0.187102)  |
| 72:  | 927.75                     | 31.570360  | ( 3.671056  | 2.999626  | -3.015950) |
| 73:  | 973.63                     | 102.949074 | ( -8.232609 | 5.928267  | 0.169932)  |
| 74:  | 983.30                     | 9.882021   | ( -2.068721 | -2.306542 | -0.531302) |
| 75:  | 994.88                     | 2.472945   | ( -1.389332 | 0.668414  | -0.309717) |
| 76:  | 1007.10                    | 12.130834  | ( 1.844181  | -2.890408 | -0.612675) |

|      |         |            |              |            |            |
|------|---------|------------|--------------|------------|------------|
| 77:  | 1015.38 | 0.593129   | ( -0.626600  | 0.431164   | -0.120825) |
| 78:  | 1018.39 | 0.327553   | ( -0.219184  | 0.103915   | -0.518376) |
| 79:  | 1028.03 | 4.222530   | ( -1.246098  | 1.632808   | -0.060909) |
| 80:  | 1030.06 | 1.801238   | ( -1.192200  | 0.465071   | 0.404483)  |
| 81:  | 1077.86 | 88.293456  | ( -8.366688  | 3.233145   | -2.799778) |
| 82:  | 1091.93 | 106.846924 | ( -4.532886  | -9.289758  | 0.016411)  |
| 83:  | 1097.24 | 93.363212  | ( 5.598945   | 7.805092   | -1.046692) |
| 84:  | 1100.79 | 102.863389 | ( -7.802500  | 6.393665   | -1.051393) |
| 85:  | 1108.54 | 165.194813 | ( -8.754976  | 9.369826   | -0.866932) |
| 86:  | 1114.76 | 96.583901  | ( -5.379548  | -8.137751  | -1.192213) |
| 87:  | 1121.79 | 90.370339  | ( -4.997176  | -7.900574  | -1.726123) |
| 88:  | 1149.38 | 13.434004  | ( 1.063245   | 3.482016   | 0.423177)  |
| 89:  | 1151.14 | 88.037771  | ( 0.676889   | -9.358281  | 0.046492)  |
| 90:  | 1180.62 | 159.142867 | ( -11.057948 | -6.034953  | -0.666331) |
| 91:  | 1192.03 | 143.850520 | ( -0.222102  | -11.988993 | 0.255413)  |
| 92:  | 1207.42 | 4.181203   | ( 1.598743   | -1.274195  | -0.040632) |
| 93:  | 1218.11 | 89.745712  | ( -4.297455  | 8.253425   | 1.777235)  |
| 94:  | 1221.20 | 2.457735   | ( 0.120624   | -1.495359  | 0.455066)  |
| 95:  | 1236.29 | 0.818869   | ( 0.838043   | 0.014278   | 0.341100)  |
| 96:  | 1242.11 | 16.164247  | ( 1.294889   | 3.753250   | -0.632951) |
| 97:  | 1251.38 | 3.955814   | ( -1.473133  | -1.325356  | -0.170662) |
| 98:  | 1254.04 | 3.904482   | ( 1.359939   | -1.400100  | -0.307843) |
| 99:  | 1278.95 | 9.918434   | ( 2.919681   | -0.287931  | -1.144987) |
| 100: | 1284.06 | 2.941889   | ( 0.045765   | 0.416859   | -1.663137) |
| 101: | 1330.39 | 0.930770   | ( -0.135161  | -0.813882  | -0.500098) |
| 102: | 1332.66 | 215.932436 | ( 13.186296  | 6.136641   | 2.096583)  |
| 103: | 1341.81 | 14.673876  | ( -3.492843  | 0.821466   | -1.341312) |
| 104: | 1355.76 | 6.219677   | ( -1.306780  | 1.972964   | -0.787031) |
| 105: | 1392.02 | 3.625600   | ( -0.037793  | 1.040903   | 1.593955)  |
| 106: | 1411.27 | 4.180797   | ( 1.788199   | 0.554603   | 0.821922)  |
| 107: | 1425.33 | 14.281309  | ( -3.334345  | -0.260094  | -1.759490) |
| 108: | 1425.63 | 7.185617   | ( 1.645448   | 1.854834   | 1.018680)  |
| 109: | 1431.33 | 7.572195   | ( -1.333676  | 1.205524   | 2.083318)  |
| 110: | 1432.61 | 11.614982  | ( -1.079488  | -0.335260  | 3.215166)  |
| 111: | 1439.20 | 13.297750  | ( 2.023551   | -1.906172  | 2.359978)  |
| 112: | 1460.76 | 6.452170   | ( 0.286562   | -2.475481  | -0.491982) |
| 113: | 1462.90 | 7.949509   | ( 1.914052   | -1.635624  | 1.269113)  |
| 114: | 1471.46 | 40.220624  | ( -3.387498  | -5.317282  | -0.687016) |
| 115: | 1471.68 | 49.865750  | ( 6.858559   | -1.483249  | -0.791132) |
| 116: | 1497.69 | 1.949393   | ( 0.672010   | 0.620316   | 1.054990)  |
| 117: | 1502.24 | 0.956162   | ( -0.635780  | 0.396036   | 0.628571)  |
| 118: | 1508.35 | 12.114763  | ( -2.496514  | -2.355856  | 0.576300)  |
| 119: | 1517.12 | 3.454573   | ( 0.367252   | 1.638722   | 0.796422)  |
| 120: | 1517.53 | 5.110424   | ( -2.014310  | 0.343888   | -0.966809) |
| 121: | 1517.98 | 9.823501   | ( 0.706444   | 2.876478   | 1.024848)  |
| 122: | 1519.92 | 9.933767   | ( -2.232633  | 2.187831   | -0.403127) |
| 123: | 1523.63 | 1.166904   | ( 0.549572   | -0.750817  | 0.548770)  |
| 124: | 1524.42 | 1.227591   | ( 0.692994   | -0.839419  | -0.206706) |
| 125: | 1527.43 | 0.903429   | ( -0.697038  | -0.640484  | 0.085719)  |
| 126: | 1537.28 | 24.269002  | ( -4.919131  | -0.202855  | 0.173219)  |
| 127: | 1540.91 | 9.356389   | ( 2.410741   | 1.261342   | -1.397759) |
| 128: | 1542.88 | 26.098884  | ( 2.340552   | 4.347266   | 1.312241)  |
| 129: | 1594.47 | 108.346878 | ( -3.486734  | -2.493034  | -9.485481) |
| 130: | 1600.65 | 61.974354  | ( 4.178511   | -0.176185  | 6.669585)  |
| 131: | 1649.04 | 157.086788 | ( 2.561380   | -9.978396  | 7.138469)  |
| 132: | 1652.13 | 275.017304 | ( 7.598708   | -11.961647 | -8.613707) |
| 133: | 2816.86 | 63.845270  | ( 7.606118   | -1.028392  | -2.221407) |
| 134: | 2822.22 | 48.328446  | ( -4.674033  | -1.284854  | 4.983073)  |
| 135: | 2862.65 | 24.272028  | ( 0.870494   | -0.919493  | -4.761176) |
| 136: | 2862.82 | 46.336167  | ( 1.628461   | 2.169965   | 6.243039)  |
| 137: | 2867.27 | 36.405889  | ( -5.384718  | -2.505342  | 1.064877)  |
| 138: | 2868.40 | 2.442257   | ( -1.323255  | 0.486415   | -0.674280) |
| 139: | 2871.21 | 8.198309   | ( -0.430823  | -1.400188  | 2.460117)  |
| 140: | 2874.25 | 18.803518  | ( 0.149700   | 0.497397   | 4.305079)  |
| 141: | 2877.29 | 54.931016  | ( 5.126712   | 3.276245   | 4.232501)  |
| 142: | 2881.19 | 23.585827  | ( 2.789952   | -3.158107  | 2.414198)  |
| 143: | 2901.48 | 22.275540  | ( 2.959022   | 1.731869   | 3.243511)  |
| 144: | 2915.27 | 22.115990  | ( 4.372191   | 1.076680   | -1.356721) |
| 145: | 2917.21 | 20.264849  | ( -1.880238  | 0.317274   | 4.077854)  |
| 146: | 2918.89 | 5.293766   | ( -1.785363  | 0.795284   | -1.213989) |
| 147: | 2921.03 | 40.605886  | ( 5.862063   | 2.240344   | 1.105875)  |
| 148: | 2921.58 | 31.763571  | ( -3.454799  | -4.449366  | 0.176287)  |
| 149: | 2921.86 | 6.647004   | ( -1.953827  | -1.568648  | -0.607377) |
| 150: | 2923.99 | 35.239563  | ( -4.415760  | 3.954814   | -0.316352) |
| 151: | 2924.47 | 42.475943  | ( 1.794451   | -2.853647  | 5.577866)  |
| 152: | 2927.01 | 21.444636  | ( 0.859505   | -4.475398  | -0.822621) |
| 153: | 3173.81 | 0.191268   | ( 0.161205   | -0.373417  | -0.160749) |
| 154: | 3180.94 | 0.324333   | ( -0.338764  | 0.407090   | -0.209402) |
| 155: | 3188.38 | 0.187303   | ( -0.167226  | -0.027099  | 0.398252)  |

156: 3421.91 38.448170 ( 4.015726 -1.646132 4.428585)  
 157: 3423.51 38.119433 ( 1.625163 4.027180 4.388633)  
 158: 3437.33 165.712469 ( 8.764851 8.344253 4.388996)

The first frequency considered to be a vibration is 6  
 The total number of vibrations considered is 153

### TMA and HMMM

| Mode | freq (cm <sup>-1</sup> ) | T**2       | TX          | TY         | TZ         |
|------|--------------------------|------------|-------------|------------|------------|
| 6:   | 13.13                    | 0.161189   | ( 0.136915  | 0.260289   | -0.273300) |
| 7:   | 14.90                    | 1.282254   | ( -1.058693 | 0.307329   | -0.258790) |
| 8:   | 19.83                    | 0.122227   | ( -0.210267 | 0.248835   | 0.126871)  |
| 9:   | 27.98                    | 0.934362   | ( 0.632206  | 0.610969   | 0.401739)  |
| 10:  | 33.20                    | 1.405469   | ( -0.844508 | 0.027991   | -0.831560) |
| 11:  | 33.43                    | 0.495519   | ( 0.123061  | 0.460983   | 0.517562)  |
| 12:  | 37.38                    | 1.313776   | ( 0.690720  | 0.603142   | 0.687679)  |
| 13:  | 48.62                    | 2.059650   | ( 0.093983  | 0.469711   | -1.352845) |
| 14:  | 56.38                    | 1.334951   | ( -0.401727 | -0.910981  | -0.586242) |
| 15:  | 60.49                    | 2.603556   | ( -0.314839 | -1.578982  | -0.106060) |
| 16:  | 78.26                    | 2.129143   | ( -0.176763 | 1.271961   | 0.692830)  |
| 17:  | 84.66                    | 2.885257   | ( 0.467542  | -1.590042  | 0.372061)  |
| 18:  | 92.21                    | 0.012312   | ( -0.051670 | -0.062862  | 0.075434)  |
| 19:  | 98.42                    | 4.771276   | ( -1.873118 | -0.917319  | 0.649023)  |
| 20:  | 121.79                   | 0.387536   | ( 0.409078  | -0.282392  | -0.374762) |
| 21:  | 132.85                   | 1.872946   | ( -0.183690 | 1.353139   | 0.090652)  |
| 22:  | 138.36                   | 1.433921   | ( 0.742770  | -0.880190  | -0.327839) |
| 23:  | 141.66                   | 0.631938   | ( 0.675641  | -0.410103  | -0.085223) |
| 24:  | 151.59                   | 0.754526   | ( 0.450536  | 0.103694   | 0.735385)  |
| 25:  | 160.32                   | 0.062456   | ( -0.180849 | -0.149565  | -0.085906) |
| 26:  | 162.30                   | 2.788775   | ( 1.479169  | -0.773824  | -0.045061) |
| 27:  | 170.79                   | 1.406653   | ( -0.657351 | -0.791806  | -0.589565) |
| 28:  | 175.87                   | 1.167449   | ( -0.275145 | 0.903919   | -0.524093) |
| 29:  | 190.67                   | 0.293090   | ( 0.381167  | -0.063477  | 0.379174)  |
| 30:  | 198.59                   | 0.595801   | ( -0.386328 | 0.634817   | 0.208708)  |
| 31:  | 201.21                   | 1.159865   | ( -0.334441 | 0.060492   | 1.021937)  |
| 32:  | 229.66                   | 5.093888   | ( -0.764041 | 2.060697   | 0.513478)  |
| 33:  | 236.83                   | 1.050740   | ( -0.155412 | 0.986233   | 0.232233)  |
| 34:  | 248.85                   | 3.941438   | ( 1.253142  | 1.091260   | -1.086381) |
| 35:  | 277.56                   | 10.477151  | ( -1.959607 | -2.570362  | 0.174157)  |
| 36:  | 293.08                   | 9.167832   | ( 1.045839  | 2.577480   | -1.196098) |
| 37:  | 302.27                   | 2.574749   | ( -1.455192 | -0.562270  | 0.375523)  |
| 38:  | 310.50                   | 1.746166   | ( 1.136825  | -0.666688  | 0.096558)  |
| 39:  | 328.39                   | 4.454687   | ( -1.605632 | -0.815176  | -1.100964) |
| 40:  | 349.86                   | 1.352573   | ( -0.612156 | -0.070231  | 0.986360)  |
| 41:  | 394.53                   | 15.353402  | ( -1.834755 | 2.366303   | -2.527387) |
| 42:  | 404.75                   | 5.540373   | ( -1.232553 | -1.989577  | 0.250540)  |
| 43:  | 410.26                   | 8.558053   | ( -2.660202 | 0.022480   | 1.216912)  |
| 44:  | 413.32                   | 3.751257   | ( -0.248473 | -1.766626  | -0.754024) |
| 45:  | 434.97                   | 2.927934   | ( 0.328981  | -1.678023  | 0.062815)  |
| 46:  | 447.21                   | 8.622485   | ( 1.626017  | 2.423377   | 0.325262)  |
| 47:  | 484.36                   | 26.275542  | ( 1.447916  | -4.909426  | -0.276806) |
| 48:  | 491.41                   | 45.707417  | ( -6.638600 | -1.091016  | 0.667905)  |
| 49:  | 513.44                   | 74.673654  | ( 1.543027  | 8.439707   | 1.031536)  |
| 50:  | 518.84                   | 21.411365  | ( 3.887177  | -2.436899  | -0.602281) |
| 51:  | 529.78                   | 17.960097  | ( 3.051090  | -0.722900  | -2.851028) |
| 52:  | 581.38                   | 43.770393  | ( 1.427339  | -5.445972  | -3.474837) |
| 53:  | 588.90                   | 39.348531  | ( 6.232394  | 0.488254   | -0.517109) |
| 54:  | 612.27                   | 62.622471  | ( -6.057937 | -4.927910  | 1.280458)  |
| 55:  | 626.10                   | 13.463654  | ( -1.874507 | 2.996627   | 0.984937)  |
| 56:  | 639.42                   | 29.850309  | ( -3.740808 | 1.743486   | -3.580073) |
| 57:  | 640.66                   | 6.066001   | ( -2.170582 | -0.986358  | -0.617795) |
| 58:  | 656.27                   | 21.132167  | ( 4.088366  | 1.941906   | 0.804012)  |
| 59:  | 688.39                   | 16.467824  | ( 3.420594  | 1.574011   | 1.513224)  |
| 60:  | 721.72                   | 47.638831  | ( -2.589018 | -6.348101  | -0.798392) |
| 61:  | 746.82                   | 23.427125  | ( 4.421981  | -1.091188  | -1.637840) |
| 62:  | 758.59                   | 76.397638  | ( -2.964012 | 8.145246   | 1.125717)  |
| 63:  | 759.57                   | 38.907338  | ( -0.506979 | -6.078662  | 1.303907)  |
| 64:  | 775.10                   | 13.751521  | ( 1.067876  | -3.550844  | -0.051680) |
| 65:  | 795.16                   | 41.013536  | ( -1.185616 | -5.693618  | -2.681523) |
| 66:  | 804.82                   | 42.694821  | ( -5.381669 | -2.447015  | -2.782907) |
| 67:  | 821.33                   | 146.571219 | ( 5.652427  | -10.571349 | -1.693479) |
| 68:  | 823.80                   | 35.640657  | ( -0.237605 | 5.915678   | -0.767431) |
| 69:  | 843.25                   | 75.033372  | ( 6.179935  | 4.506822   | -4.065751) |
| 70:  | 870.43                   | 138.932096 | ( 9.511366  | 5.542697   | 4.212424)  |
| 71:  | 926.34                   | 4.246987   | ( 0.391808  | -1.935568  | 0.589110)  |
| 72:  | 950.10                   | 148.592954 | ( 0.192983  | -12.183762 | -0.334139) |

|      |         |            |              |            |            |
|------|---------|------------|--------------|------------|------------|
| 73:  | 961.99  | 35.679723  | ( 5.650722   | 1.912958   | -0.299435) |
| 74:  | 974.41  | 6.862378   | ( -1.580108  | 2.005831   | -0.585047) |
| 75:  | 989.33  | 7.654877   | ( -1.098305  | -2.406559  | 0.810602)  |
| 76:  | 998.53  | 3.552529   | ( -0.988676  | -1.574629  | -0.309181) |
| 77:  | 1002.94 | 4.048553   | ( -0.580933  | -1.923107  | 0.112822)  |
| 78:  | 1021.75 | 33.856714  | ( -4.635574  | -1.289498  | -3.271905) |
| 79:  | 1023.78 | 13.696337  | ( -2.505449  | -2.609556  | -0.780564) |
| 80:  | 1025.72 | 89.209655  | ( -9.174447  | -1.493238  | -1.676132) |
| 81:  | 1030.53 | 112.796750 | ( 6.202020   | -7.988989  | -3.241565) |
| 82:  | 1056.42 | 84.491399  | ( 6.023390   | -6.562118  | -2.269092) |
| 83:  | 1059.90 | 52.478422  | ( 1.720222   | 5.320706   | -4.605360) |
| 84:  | 1064.98 | 156.203896 | ( 9.589724   | 7.511278   | -2.796748) |
| 85:  | 1089.99 | 15.007106  | ( 1.507672   | 2.464346   | -2.580897) |
| 86:  | 1118.31 | 176.950431 | ( 0.938491   | 9.257757   | -9.505977) |
| 87:  | 1134.50 | 45.475978  | ( 4.931845   | 2.668510   | 3.745923)  |
| 88:  | 1155.72 | 2.379525   | ( -1.340476  | -0.725560  | -0.237087) |
| 89:  | 1164.03 | 1.749844   | ( -1.239899  | 0.333431   | -0.318304) |
| 90:  | 1168.64 | 0.747411   | ( -0.545546  | 0.570116   | -0.353211) |
| 91:  | 1169.32 | 3.004979   | ( -1.506548  | -0.828525  | -0.220997) |
| 92:  | 1170.20 | 2.104734   | ( -0.721093  | -0.651951  | -1.076902) |
| 93:  | 1172.20 | 0.606512   | ( 0.314372   | 0.231569   | 0.673838)  |
| 94:  | 1174.29 | 10.145439  | ( -2.023442  | 2.454714   | -0.159696) |
| 95:  | 1194.21 | 1.522467   | ( -0.289838  | 0.285664   | -1.164842) |
| 96:  | 1204.02 | 78.329515  | ( -3.559677  | 3.067281   | -7.500000) |
| 97:  | 1211.58 | 3.807740   | ( 1.279834   | -0.651315  | 1.321193)  |
| 98:  | 1213.32 | 7.187596   | ( 0.814074   | -2.491985  | 0.561150)  |
| 99:  | 1216.16 | 7.093087   | ( -1.399579  | -2.235559  | 0.369518)  |
| 100: | 1217.19 | 2.427853   | ( -0.488226  | 0.847872   | 1.212684)  |
| 101: | 1217.55 | 3.616258   | ( -0.201009  | 0.655070   | 1.773905)  |
| 102: | 1253.99 | 326.450512 | ( 7.799510   | 13.951507  | -8.424583) |
| 103: | 1279.08 | 8.412372   | ( -0.182695  | -2.827831  | 0.618357)  |
| 104: | 1303.12 | 10.461004  | ( -2.304699  | -2.204779  | -0.536949) |
| 105: | 1329.22 | 29.427496  | ( -4.235830  | -3.051778  | 1.473735)  |
| 106: | 1361.65 | 77.491516  | ( 1.971699   | -4.032805  | 7.572345)  |
| 107: | 1382.11 | 464.463808 | ( -18.859678 | -9.599868  | -4.076625) |
| 108: | 1392.41 | 499.302628 | ( 10.186529  | -19.739837 | -2.424061) |
| 109: | 1454.52 | 13.579023  | ( -2.611272  | -2.598692  | -0.084166) |
| 110: | 1458.09 | 3.833056   | ( -0.202021  | -1.916499  | -0.345361) |
| 111: | 1459.90 | 13.670340  | ( 3.403132   | 1.437895   | 0.146603)  |
| 112: | 1461.28 | 1.483685   | ( -0.370445  | 0.949265   | -0.667346) |
| 113: | 1462.13 | 2.736564   | ( -0.736242  | -0.916984  | -1.163465) |
| 114: | 1464.11 | 3.574480   | ( -1.166899  | -1.431508  | -0.404489) |
| 115: | 1476.33 | 10.272446  | ( -2.625874  | 1.835190   | -0.096486) |
| 116: | 1477.55 | 3.762603   | ( -0.249767  | -0.327991  | -1.895426) |
| 117: | 1478.53 | 7.222128   | ( -0.195276  | -1.035860  | 2.472042)  |
| 118: | 1481.28 | 7.691186   | ( -1.554904  | -2.292343  | 0.136462)  |
| 119: | 1481.63 | 8.357907   | ( 2.396277   | 0.414512   | 1.563312)  |
| 120: | 1484.61 | 5.046733   | ( -0.984625  | -1.491538  | -1.361088) |
| 121: | 1499.65 | 5.714187   | ( -1.623478  | 0.785125   | -1.569103) |
| 122: | 1500.48 | 10.525525  | ( -1.839006  | 2.378909   | 1.218348)  |
| 123: | 1502.77 | 9.515399   | ( 2.352892   | -0.329256  | 1.967457)  |
| 124: | 1507.66 | 3.185886   | ( -1.536020  | 0.071887   | -0.906290) |
| 125: | 1508.45 | 2.544262   | ( 0.983460   | 0.962818   | -0.806256) |
| 126: | 1520.13 | 0.561147   | ( 0.381795   | 0.634261   | -0.114417) |
| 127: | 1576.92 | 649.640076 | ( -24.457194 | -6.231714  | -3.556895) |
| 128: | 1595.56 | 704.485436 | ( 3.501033   | -26.159293 | -2.814178) |
| 129: | 1608.16 | 3.061228   | ( 0.280817   | -0.421134  | -1.674818) |
| 130: | 1636.59 | 18.206602  | ( 3.888559   | 1.186407   | 1.295434)  |
| 131: | 1788.31 | 401.123223 | ( -16.835441 | -10.727293 | 1.617507)  |
| 132: | 1823.97 | 305.803854 | ( 1.120095   | 12.995374  | 11.647725) |
| 133: | 3013.83 | 26.988651  | ( -2.438347  | 4.557614   | -0.520839) |
| 134: | 3015.12 | 27.106107  | ( -5.183022  | 0.403423   | 0.282199)  |
| 135: | 3018.84 | 76.342284  | ( -4.034533  | -7.260134  | 2.712062)  |
| 136: | 3020.76 | 67.698555  | ( 5.178062   | -3.558859  | -5.312321) |
| 137: | 3033.67 | 32.617331  | ( -4.750514  | 2.324821   | 2.155262)  |
| 138: | 3081.47 | 26.892238  | ( -0.950300  | 4.334249   | -2.683924) |
| 139: | 3081.74 | 27.753219  | ( 3.914197   | 2.870468   | 2.047607)  |
| 140: | 3086.37 | 26.476647  | ( 1.289771   | -4.842398  | -1.168039) |
| 141: | 3091.07 | 24.850873  | ( 4.908651   | -0.819794  | 0.289750)  |
| 142: | 3110.95 | 14.132421  | ( 2.643237   | 1.866270   | 1.913832)  |
| 143: | 3117.47 | 13.860611  | ( -2.128868  | -0.974349  | -2.894681) |
| 144: | 3118.72 | 11.210113  | ( -0.919119  | -2.939973  | 1.312210)  |
| 145: | 3121.07 | 15.325136  | ( 1.888336   | 0.091372   | 3.427969)  |
| 146: | 3122.01 | 15.492564  | ( -2.458262  | 1.441658   | 2.714983)  |
| 147: | 3124.95 | 12.614890  | ( 0.693321   | -2.609697  | 2.307309)  |
| 148: | 3169.39 | 4.543779   | ( 1.888031   | 0.757717   | -0.636382) |
| 149: | 3182.70 | 5.081352   | ( 1.342388   | 0.108804   | 1.807625)  |
| 150: | 3191.78 | 6.682592   | ( 0.915337   | 1.525440   | -1.875576) |
| 151: | 3200.08 | 5.665525   | ( -0.308461  | -0.756560  | 2.235619)  |

152: 3752.21 107.756670 ( -7.172348 0.044425 -7.504141)

The first frequency considered to be a vibration is 6  
The total number of vibrations considered is 147
