# Supplementary material for: Computationally-accelerated prediction of polyester-melamine coatings degradation to design sustainable organically-coated steels for outdoor applications
Source: Royal Society of Chemistry journal article supplement (doi:10.1039/d3ra06744k), 2024-01-01
Supplement: d3ra06744k5.pdf [file d3ra06744k5.pdf]

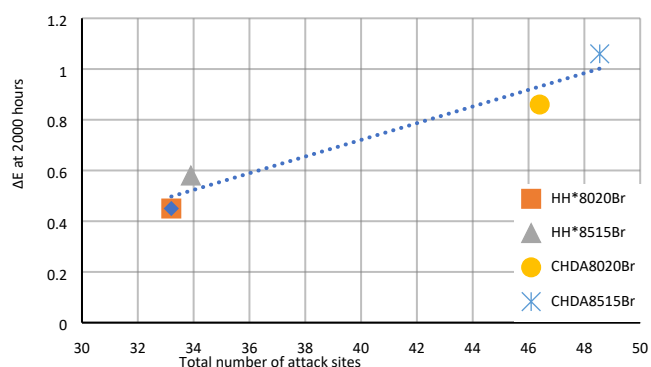

**Figure 1** - Linear correlation between the number of molecular sites that would undergo nucleophilic or electrophilic attacks according to the dual descriptor of the Fukui function against the  $\Delta E$  of samples exposed in accelerated weathering tests.

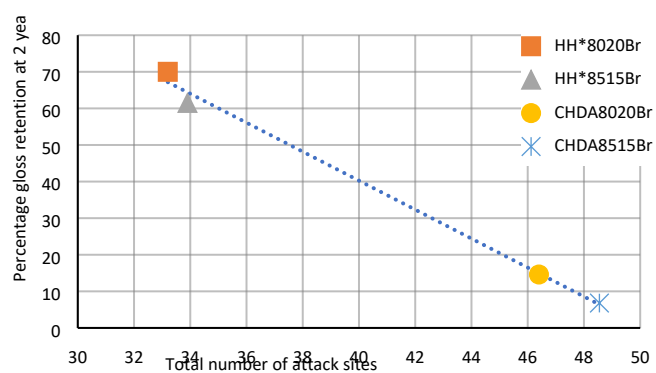

**Figure 2** - Linear correlation between the number of molecular sites that would undergo nucleophilic or electrophilic attacks according to the dual descriptor of the Fukui function against the average percentage of gloss retention of samples exposed in natural weathering.

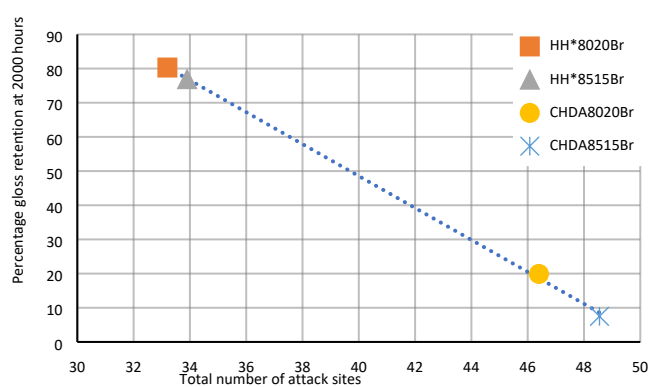

**Figure 3** - Linear correlation between the number of molecular sites that would undergo nucleophilic or electrophilic attacks according to the dual descriptor of the Fukui function against the percentage of gloss retention of samples exposed in accelerated weathering tests.

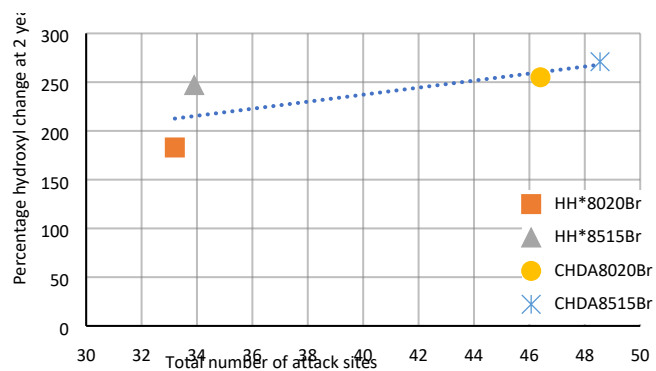

**Figure 4** - Linear correlation between the number of molecular sites that would undergo nucleophilic or electrophilic attacks according to the dual descriptor of the Fukui function against the percentage change in hydroxyl activity of samples exposed in natural weathering tests.

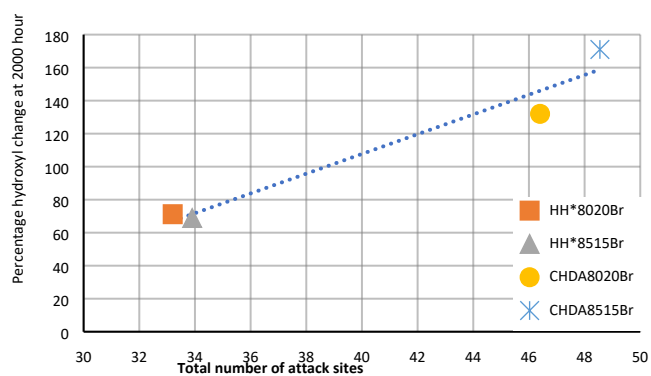

**Figure 5** - Linear correlation between the number of molecular sites that would undergo nucleophilic or electrophilic attacks according to the dual descriptor of the Fukui function against the percentage change in hydroxyl activity of samples exposed in accelerated weathering tests.

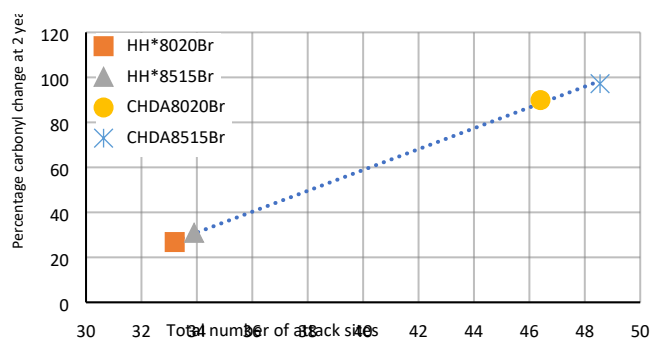

**Figure 6** - Linear correlation between the number of molecular sites that would undergo nucleophilic or electrophilic attacks according to the dual descriptor of the Fukui function against the percentage change in carbonyl activity of samples exposed in natural weathering tests.

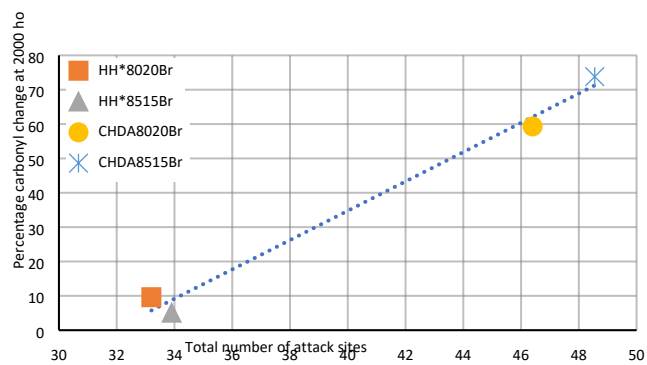

**Figure 7** - Linear correlation between the number of molecular sites that would undergo nucleophilic or electrophilic attacks according to the dual descriptor of the Fukui function against the percentage change in carbonyl activity of samples exposed in accelerated weathering tests.
