# Supplementary material for: Computationally-accelerated prediction of polyester-melamine coatings degradation to design sustainable organically-coated steels for outdoor applications
Source: Royal Society of Chemistry journal article supplement (doi:10.1039/d3ra06744k), 2024-01-01
Supplement: d3ra06744k6.pdf [file d3ra06744k6.pdf]

To assess the influence of imaginary modes on the models they were compared against the newly generated models to calculate the RMSD values (**Table 1**) and compare the Fukui functions (**Table 2**).

**Table 1** shows that there is a considerable correlation between the models, as all of the calculated values are below 0.2 Å, while it is commonly accepted that values below 1.5 Å show significant correlation.

**Table 2** shows that for the majority of models that the presence of imaginary modes did not influence the number of electrophilic or nucleophilic attack sites and that in the instance where a difference was observed it was very small and likely to be associated with the isovalue used to visually explore the models. The observed differences also did not alter the initial rankings produced within this body of work.

**Table 1 – Breakdown of the determined RMSD values**

| Model name | RMSD Value (Å) |
|------------|----------------|
| CHDA       | 0.004          |
| HMMM CHDA  | 0.197          |
| HHPA       | 0              |
| HMMM HHPA  | 0.002          |
| TMA        | 0.002          |
| TMA NPG    | 0.607          |
| HMMM TMA   | 1.099          |
| DDSA       | 0.708          |

**Table 2 – Comparing the number of attack sites between models with imaginary modes and without**

| Model designation | Before removal of imaginary modes |                          | After removal of imaginary modes |                          | Difference in number of sites |
|-------------------|-----------------------------------|--------------------------|----------------------------------|--------------------------|-------------------------------|
|                   | Electrophilic attack site         | Nucleophilic attack site | Electrophilic attack site        | Nucleophilic attack site |                               |
| CHDA              | 8                                 | 12                       | 8                                | 12                       | 0                             |
| HMMM CHDA         | 6                                 | 6                        | 6                                | 6                        | 0                             |
| HHPA              | 8                                 | 8                        | 8                                | 8                        | 0                             |
| HMMMM HHPA        | 12                                | 10                       | 9                                | 10                       | -3 electrophilic              |
| TMA               | 10                                | 18                       | 10                               | 18                       | 0                             |
| TMA NPG           | 8                                 | 8                        | 8                                | 8                        | 0                             |
| HMMMM TMA         | 16                                | 16                       | 16                               | 16                       | 0                             |
| DDSA              | 3                                 | 8                        | 5                                | 8                        | +2 electrophilic              |

**Table 3 – Weighted attack sites as a function of the polyester-melamine ratio**

| <b>Monomer base</b> | <b>Number of electrophilic sites</b> | <b>Number of nucleophilic sites</b> | <b>Total</b> |
|---------------------|--------------------------------------|-------------------------------------|--------------|
| <b>HHPA</b>         | 17.8                                 | 14.8                                | 32.6         |
| <b>CHDA</b>         | 22.8                                 | 23.6                                | 46.4         |
| <b>TMA</b>          | 24.8                                 | 35.2                                | 60           |
| <b>DDSA</b>         | 13.2                                 | 19.6                                | 32.8         |
